# Supplementary material for: Assessing GPT-3.5 and GPT-4 in Generating International Classification of Diseases Billing Codes
Source: bioRxiv or medRxiv preprint supplement (doi:10.1101/2023.07.07.23292391), 2023-07-11
Supplement: Supplementary file [file media-1.pdf]

Supplementary Table 1: Code-level generated outputs and similarity for ICD-9-CM

| Case | Original ICD-9-CM code | Original ICD-9-CM code description                                                                                 | GPT-4 Code | Description matching GPT-4 code                                                                     | Description matching billable GPT-4 code                                         | GPT-4 code semantic similarity | GPT-4 code syntactic similarity | GPT-3.5 Code | Description matching GPT-3.5 code                                                                           | Description matching billable GPT-3.5 code                                                       | GPT-3.5 code semantic similarity | GPT-3.5 code syntactic similarity |
|------|------------------------|--------------------------------------------------------------------------------------------------------------------|------------|-----------------------------------------------------------------------------------------------------|----------------------------------------------------------------------------------|--------------------------------|---------------------------------|--------------|-------------------------------------------------------------------------------------------------------------|--------------------------------------------------------------------------------------------------|----------------------------------|-----------------------------------|
| 1    | 80363                  | Other open skull fracture with cerebral laceration and contusion, with moderate [1-24 hours] loss of consciousness | 8518       | Other and unspecified cerebral laceration and contusion, without mention of open intracranial wound |                                                                                  | nan                            | False                           | 80309        | Other closed skull fracture without mention of intracranial injury, with concussion, unspecified            | Other closed skull fracture without mention of intracranial injury, with concussion, unspecified | Skull fracture                   | False                             |
| 2    | 6978                   | Other lichen, not elsewhere classified                                                                             | 6978       | Other lichen, not elsewhere classified                                                              | Other lichen, not elsewhere classified                                           | Exact Match                    | True                            | 6979         | Lichen, unspecified                                                                                         | Lichen, unspecified                                                                              | Lichen, unspecified              | True                              |
| 3    | 20242                  | Leukemic reticuloendotheliosis, intrathoracic lymph nodes                                                          | 2024       | Leukemic reticuloendotheliosis                                                                      |                                                                                  | nan                            | True                            | 20288        | Other malignant lymphomas, lymph nodes of multiple sites                                                    | Other malignant lymphomas, lymph nodes of multiple sites                                         | nan                              | False                             |
| 4    | 485                    | Bronchopneumonia, organism unspecified                                                                             | 485        | Bronchopneumonia, organism unspecified                                                              | Bronchopneumonia, organism unspecified                                           | Exact Match                    | True                            | 486          | Pneumonia, organism unspecified                                                                             | Pneumonia, organism unspecified                                                                  | Pneumonia                        | True                              |
| 5    | 9517                   | Injury to hypoglossal nerve                                                                                        | 9516       | Injury to accessory nerve                                                                           | Injury to accessory nerve                                                        | Nerve injury                   | True                            | 9555         | Injury to cutaneous sensory nerve, upper limb                                                               | Injury to cutaneous sensory nerve, upper limb                                                    | Nerve injury                     | False                             |
| 6    | 78830                  | Urinary incontinence, unspecified                                                                                  | 7883       | Urinary incontinence                                                                                |                                                                                  | nan                            | True                            | 7883         | Urinary incontinence                                                                                        |                                                                                                  | nan                              | True                              |
| 7    | 71842                  | Contracture of joint, upper arm                                                                                    | 71881      | Other joint derangement, not elsewhere classified, shoulder region                                  | Other joint derangement, not elsewhere classified, shoulder region               | Upper arm injury               | False                           | 71843        | Contracture of joint, forearm                                                                               | Contracture of joint, forearm                                                                    | nan                              | True                              |
| 8    | E9808                  | Poisoning by arsenic and its compounds, undetermined whether accidentally or purposely inflicted                   | 9851       | Gonococcal synovitis and tenosynovitis; Toxic effect of arsenic and its compounds                   | Toxic effect of arsenic and its compounds                                        | Arsenic toxicosis              | False                           | 9859         | Other gonococcal infection of joint; Toxic effect of unspecified metal                                      | Toxic effect of unspecified metal                                                                | Metal toxicosis                  | False                             |
| 9    | 67082                  | Other major puerperal infection, delivered, with mention of postpartum complication                                | 6708       | Other major puerperal infection                                                                     |                                                                                  | nan                            | True                            | 67029        |                                                                                                             |                                                                                                  | nan                              | False                             |
| 10   | 65190                  | Unspecified multiple gestation, unspecified as to episode of care or not applicable                                | 651        | Omsk hemorrhagic fever; Multiple gestation                                                          |                                                                                  | nan                            | True                            | 6519         | Unspecified multiple gestation                                                                              |                                                                                                  | nan                              | True                              |
| 11   | 85133                  | Cortex (cerebral) laceration with open intracranial wound, with moderate [1-24 hours] loss of consciousness        | 8512       | Cortex (cerebral) laceration without mention of open intracranial wound                             |                                                                                  | nan                            | True                            | 8512         | Cortex (cerebral) laceration without mention of open intracranial wound                                     |                                                                                                  | nan                              | True                              |
| 12   | 8460                   | Sprain of lumbosacral (joint) (ligament)                                                                           | 8472       | Sprain of lumbar                                                                                    | Sprain of lumbar                                                                 | Lumbar region                  | False                           | 846          | Intestinal infection due to other anaerobes; Malaria, unspecified; Sprains and strains of sacroiliac region |                                                                                                  | nan                              | True                              |
| 13   | 44321                  | Dissection of carotid artery                                                                                       | 44321      | Dissection of carotid artery                                                                        | Dissection of carotid artery                                                     | Exact Match                    | True                            | 44329        | Dissection of other artery                                                                                  | Dissection of other artery                                                                       | Artery dissection                | True                              |
| 14   | 66992                  | Unspecified complication of labor and delivery, delivered, with mention of postpartum complication                 | 6699       | Unspecified complication of labor and delivery                                                      |                                                                                  | nan                            | True                            | 6699         | Unspecified complication of labor and delivery                                                              |                                                                                                  | nan                              | True                              |
| 15   | 1280                   | Other specified respiratory tuberculosis, unspecified                                                              | 119        | Unspecified pulmonary tuberculosis                                                                  |                                                                                  | nan                            | False                           | 118          | Other specified pulmonary tuberculosis; Opportunistic mycoses                                               | Opportunistic mycoses                                                                            | nan                              | True                              |
| 16   | V301                   | Single liveborn, born before admission to hospital                                                                 | V3000      | Single liveborn, born in hospital, delivered without mention of cesarean section                    | Single liveborn, born in hospital, delivered without mention of cesarean section | Birth event                    | True                            | 76719        | Other injuries to scalp                                                                                     | Other injuries to scalp                                                                          | nan                              | False                             |
| 17   | 810                    | Murine (endemic) typhus                                                                                            | 812        | Scrub typhus; Fracture of humerus                                                                   | Scrub typhus                                                                     | Typhus                         | True                            | 802          | Intestinal infection due to enterotoxigenic E. coli; Fracture of face bones                                 | Intestinal infection due to enterotoxigenic E. coli                                              | nan                              | False                             |
| 18   | V281                   | Antenatal screening for raised alpha-fetoprotein levels in amniotic fluid                                          | V287       |                                                                                                     |                                                                                  | nan                            | True                            | V270         | Outcome of delivery, single liveborn                                                                        | Outcome of delivery, single liveborn                                                             | nan                              | False                             |

|    |       |                                                                                                                                 |       |                                                                                                   |                                                                                                   |                                                 |       |       |                                                                                                                                                         |                                                                                                               |                        |       |
|----|-------|---------------------------------------------------------------------------------------------------------------------------------|-------|---------------------------------------------------------------------------------------------------|---------------------------------------------------------------------------------------------------|-------------------------------------------------|-------|-------|---------------------------------------------------------------------------------------------------------------------------------------------------------|---------------------------------------------------------------------------------------------------------------|------------------------|-------|
| 19 | 30452 | Hallucinogen dependence, episodic                                                                                               | 3045  | Hallucinogen dependence                                                                           |                                                                                                   | nan                                             | True  | 3045  | Hallucinogen dependence                                                                                                                                 |                                                                                                               | nan                    | True  |
| 20 | 64224 | Other pre-existing hypertension, complicating pregnancy, childbirth, and the puerperium, . postpartum condition or complication | 6427  | Pre-eclampsia or eclampsia superimposed on pre-existing hypertension                              |                                                                                                   | nan                                             | True  | 6429  | Unspecified hypertension complicating pregnancy, childbirth, or the puerperium                                                                          |                                                                                                               | nan                    | True  |
| 21 | 77182 | Urinary tract infection of newborn                                                                                              | 77182 | Urinary tract infection of newborn                                                                | Urinary tract infection of newborn                                                                | Exact Match                                     | True  | 77181 | Septicemia [sepsis] of newborn                                                                                                                          | Septicemia [sepsis] of newborn                                                                                | Infection of newborn   | True  |
| 22 | 8977  | Traumatic amputation of leg(s) (complete) (partial), bilateral [any level], complicated                                         | 8977  | Traumatic amputation of leg(s) (complete) (partial), bilateral [any level], complicated           | Traumatic amputation of leg(s) (complete) (partial), bilateral [any level], complicated           | Exact Match                                     | True  | 8959  |                                                                                                                                                         |                                                                                                               | nan                    | False |
| 23 | 20531 | Myeloid sarcoma, in remission                                                                                                   | 20501 | Acute myeloid leukemia, in remission                                                              | Acute myeloid leukemia, in remission                                                              | Myeloid cancer                                  | True  | 20871 |                                                                                                                                                         |                                                                                                               | nan                    | False |
| 24 | 9134  | Insect bite, nonvenomous of elbow, forearm, and wrist, without mention of infection                                             | 9194  | Insect bite, nonvenomous, of other, multiple, and unspecified sites, without mention of infection | Insect bite, nonvenomous, of other, multiple, and unspecified sites, without mention of infection | Insect bite                                     | True  | 9174  | Insect bite, nonvenomous, of foot and toe(s), without mention of infection                                                                              | Insect bite, nonvenomous, of foot and toe(s), without mention of infection                                    | Insect bite            | True  |
| 25 | 4838  | Pneumonia due to other specified organism                                                                                       | 486   | Pneumonia, organism unspecified                                                                   | Pneumonia, organism unspecified                                                                   | Pneumonia                                       | True  | 48289 | Pneumonia due to other specified bacteria                                                                                                               | Pneumonia due to other specified bacteria                                                                     | nan                    | True  |
| 26 | 48882 | Influenza due to identified novel influenza A virus with other respiratory manifestations                                       | 48811 | Influenza due to identified 2009 H1N1 influenza virus with pneumonia                              | Influenza due to identified 2009 H1N1 influenza virus with pneumonia                              | Influenza                                       | False | 48819 | Influenza due to identified 2009 H1N1 influenza virus with other manifestations                                                                         | Influenza due to identified 2009 H1N1 influenza virus with other manifestations                               | Influenza              | False |
| 27 | V5872 | Aftercare following surgery of the nervous system, NEC                                                                          | V5849 | Other specified aftercare following surgery                                                       | Other specified aftercare following surgery                                                       | Aftercare                                       | False | V5881 | Fitting and adjustment of vascular catheter                                                                                                             | Fitting and adjustment of vascular catheter                                                                   | nan                    | False |
| 28 | 6220  | Erosion and ectropion of cervix                                                                                                 | 6221  | Dysplasia of cervix (uteri)                                                                       |                                                                                                   | nan                                             | True  | 62211 | Mild dysplasia of cervix                                                                                                                                | Mild dysplasia of cervix                                                                                      | Cervical condition     | True  |
| 29 | 2707  | Other disturbances of straight-chain amino-acid metabolism                                                                      | 2708  | Other specified disorders of amino-acid metabolism                                                | Other specified disorders of amino-acid metabolism                                                | Amino acid metabolism                           | True  | 2708  | Other specified disorders of amino-acid metabolism                                                                                                      | Other specified disorders of amino-acid metabolism                                                            | Amino acid metabolism  | True  |
| 30 | 78704 | Bilious emesis                                                                                                                  | 78703 | Vomiting alone                                                                                    | Vomiting alone                                                                                    | Vomiting                                        | True  | 577   | Diseases of pancreas                                                                                                                                    |                                                                                                               | nan                    | False |
| 31 | E9458 | Other and unspecified respiratory drugs causing adverse effects in therapeutic use                                              | E9479 | Unspecified drug or medicinal substance causing adverse effects in therapeutic use                | Unspecified drug or medicinal substance causing adverse effects in therapeutic use                | Drug-related adverse event                      | False | 9952  | Other venereal diseases due to chlamydia trachomatis, anus and rectum; Other and unspecified adverse effect of drug, medicinal and biological substance | Other venereal diseases due to chlamydia trachomatis, anus and rectum                                         | nan                    | False |
| 32 | 31220 | Socialized conduct disorder, unspecified                                                                                        | 3129  | Unspecified disturbance of conduct                                                                | Unspecified disturbance of conduct                                                                | Conduct disorder                                | True  | 31281 | Conduct disorder, childhood onset type                                                                                                                  | Conduct disorder, childhood onset type                                                                        | Conduct disorder       | False |
| 33 | 1224  | Echinococcus granulosus infection, unspecified                                                                                  | 1229  | Echinococcosis, other and unspecified                                                             | Echinococcosis, other and unspecified                                                             | Echinococcus infection                          | True  | 1229  | Echinococcosis, other and unspecified                                                                                                                   | Echinococcosis, other and unspecified                                                                         | Echinococcus infection | True  |
| 34 | 71126 | Arthropathy in Behcet's syndrome, lower leg                                                                                     | 7131  | Arthropathy associated with gastrointestinal conditions other than infections                     | Arthropathy associated with gastrointestinal conditions other than infections                     | Arthropathy related to gastrointestinal disease | False | 1361  | Tuberculous encephalitis or myelitis, bacteriological or histological examination not done; Behcet's syndrome                                           | Tuberculous encephalitis or myelitis, bacteriological or histological examination not done; Behcet's syndrome | Behcet's syndrome      | False |
| 35 | 30543 | Sedative, hypnotic or anxiolytic abuse, in remission                                                                            | 3041  | Sedative, hypnotic or anxiolytic dependence                                                       |                                                                                                   | nan                                             | False | 30421 | Cocaine dependence, continuous                                                                                                                          | Cocaine dependence, continuous                                                                                | Substance use          | False |
| 36 | 74924 | Cleft palate with cleft lip, bilateral, incomplete                                                                              | 7492  | Cleft palate with cleft lip                                                                       |                                                                                                   | nan                                             | True  | 7492  | Cleft palate with cleft lip                                                                                                                             |                                                                                                               | nan                    | True  |
| 37 | 76492 | Fetal growth retardation, unspecified, 500-749 grams                                                                            | 764   | Slow fetal growth and fetal malnutrition                                                          |                                                                                                   | nan                                             | True  | 765   | Disorders relating to short gestation and unspecified low birthweight                                                                                   |                                                                                                               | nan                    | True  |
| 38 | V2134 | Low birth weight status, 1500-1999 grams                                                                                        | 7641  | "Light-for-dates" with signs of fetal malnutrition                                                |                                                                                                   | nan                                             | False | 76402 | "Light-for-dates" without mention of fetal malnutrition, 500-749 grams                                                                                  | "Light-for-dates" without mention of fetal malnutrition, 500-749 grams                                        | Low birth weight       | False |
| 39 | 308   | Other specified leprosy                                                                                                         | 308   | Acute reaction to stress                                                                          | Other specified leprosy                                                                           | Exact Match                                     | True  | 308   | Acute reaction to stress                                                                                                                                | Other specified leprosy                                                                                       | Exact Match            | True  |

|    |       |                                                                                                                            |       |                                                                                                                 |                                                                                                 |                                             |       |       |                                                                                                                                 |                                                                                                                                 |                                                                |       |
|----|-------|----------------------------------------------------------------------------------------------------------------------------|-------|-----------------------------------------------------------------------------------------------------------------|-------------------------------------------------------------------------------------------------|---------------------------------------------|-------|-------|---------------------------------------------------------------------------------------------------------------------------------|---------------------------------------------------------------------------------------------------------------------------------|----------------------------------------------------------------|-------|
| 40 | 80056 | Open fracture of vault of skull without mention of intracranial injury, with loss of consciousness of unspecified duration | 803   | Intestinal infection due to enteroinvasive E. coli; Other and unqualified skull fractures                       |                                                                                                 | nan                                         | True  | 80002 | Closed fracture of vault of skull without mention of intracranial injury, with brief [less than one hour] loss of consciousness | Closed fracture of vault of skull without mention of intracranial injury, with brief [less than one hour] loss of consciousness | Skull fracture                                                 | False |
| 41 | 9882  | Toxic effect of berries and other plants eaten as food                                                                     | E8631 | Accidental poisoning by insecticides of organophosphorus compounds                                              | Accidental poisoning by insecticides of organophosphorus compounds                              | nan                                         | False | 9892  | Toxic effect of chlorinated hydrocarbons                                                                                        | Toxic effect of chlorinated hydrocarbons                                                                                        | nan                                                            | True  |
| 42 | 78832 | Stress incontinence, male                                                                                                  | 78832 | Stress incontinence, male                                                                                       | Stress incontinence, male                                                                       | Exact Match                                 | True  | 78832 | Stress incontinence, male                                                                                                       | Stress incontinence, male                                                                                                       | Exact Match                                                    | True  |
| 43 | 5829  | Chronic glomerulonephritis with unspecified pathological lesion in kidney                                                  | 5829  | Other human herpesvirus encephalitis; Chronic glomerulonephritis with unspecified pathological lesion in kidney | Chronic glomerulonephritis with unspecified pathological lesion in kidney                       | Exact Match                                 | True  | 5839  | Nephritis and nephropathy, not specified as acute or chronic, with unspecified pathological lesion in kidney                    | Nephritis and nephropathy, not specified as acute or chronic, with unspecified pathological lesion in kidney                    | Nephritis                                                      | True  |
| 44 | 30552 | Opioid abuse, episodic                                                                                                     | 3055  | Opioid abuse                                                                                                    |                                                                                                 | nan                                         | True  | 30552 | Opioid abuse, episodic                                                                                                          | Opioid abuse, episodic                                                                                                          | Exact Match                                                    | True  |
| 45 | V352  | Other multiple birth (three or more), mates all stillborn, born outside of hospital and not hospitalized                   | V273  | Outcome of delivery, twins, one liveborn and one stillborn                                                      | Outcome of delivery, twins, one liveborn and one stillborn                                      | Multiple births with stillborn(s)           | False | 65563 | Suspected damage to fetus from radiation, affecting management of mother, antepartum condition or complication                  | Suspected damage to fetus from radiation, affecting management of mother, antepartum condition or complication                  | Birth complication                                             | False |
| 46 | 71622 | Allergic arthritis, upper arm                                                                                              | 71651 | Unspecified polyarthropathy or polyarthritis, shoulder region                                                   | Unspecified polyarthropathy or polyarthritis, shoulder region                                   | Arthritis of upper arm                      | False | 71432 | Pauciarticular juvenile rheumatoid arthritis                                                                                    | Pauciarticular juvenile rheumatoid arthritis                                                                                    | Arthritis                                                      | False |
| 47 | 498   | Other specified non-arthropod-borne viral diseases of central nervous system                                               | 498   | Other specified non-arthropod-borne viral diseases of central nervous system                                    | Other specified non-arthropod-borne viral diseases of central nervous system                    | Exact Match                                 | True  | 3239  | Unspecified causes of encephalitis, myelitis, and encephalomyelitis                                                             | Unspecified causes of encephalitis, myelitis, and encephalomyelitis                                                             | nan                                                            | False |
| 48 | E8602 | Accidental poisoning by methyl alcohol                                                                                     | E8600 | Accidental poisoning by alcoholic beverages                                                                     | Accidental poisoning by alcoholic beverages                                                     | Alcohol-based poisoning                     | True  | 980   | Gonococcal infection (acute) of lower genitourinary tract; Toxic effect of alcohol                                              | Gonococcal infection (acute) of lower genitourinary tract                                                                       | nan                                                            | False |
| 49 | 6068  | Infertility due to extratesticular causes                                                                                  | 6069  | Male infertility, unspecified                                                                                   | Male infertility, unspecified                                                                   | Male Infertility                            | True  | 6069  | Male infertility, unspecified                                                                                                   | Male infertility, unspecified                                                                                                   | Male Infertility                                               | True  |
| 50 | 2702  | Other disturbances of aromatic amino-acid metabolism                                                                       | 2702  | Other disturbances of aromatic amino-acid metabolism                                                            | Other disturbances of aromatic amino-acid metabolism                                            | Exact Match                                 | True  | 2708  | Other specified disorders of amino-acid metabolism                                                                              | Other specified disorders of amino-acid metabolism                                                                              | Amino acid metabolism                                          | True  |
| 51 | 71537 | Osteoarthritis, localized, not specified whether primary or secondary, ankle and foot                                      | 71597 | Osteoarthritis, unspecified whether generalized or localized, ankle and foot                                    | Osteoarthritis, unspecified whether generalized or localized, ankle and foot                    | Osteoarthritis, ankle and foot              | True  | 71517 | Osteoarthritis, localized, primary, ankle and foot                                                                              | Osteoarthritis, localized, primary, ankle and foot                                                                              | Osteoarthritis, ankle and foot                                 | True  |
| 52 | 34201 | Flaccid hemiplegia and hemiparesis affecting dominant side                                                                 | 43821 | Late effects of cerebrovascular disease, hemiplegia affecting dominant side                                     | Late effects of cerebrovascular disease, hemiplegia affecting dominant side                     | Hemiplegia, dominant side                   | False | 34201 | Flaccid hemiplegia and hemiparesis affecting dominant side                                                                      | Flaccid hemiplegia and hemiparesis affecting dominant side                                                                      | Exact Match                                                    | True  |
| 53 | E8743 | Mechanical failure of instrument or apparatus during endoscopic examination                                                | E8700 | Accidental cut, puncture, perforation or hemorrhage during surgical operation                                   | Accidental cut, puncture, perforation or hemorrhage during surgical operation                   | Procedure complication                      | False | 99882 | Cataract fragments in eye following cataract surgery                                                                            | Cataract fragments in eye following cataract surgery                                                                            | Procedure complication                                         | False |
| 54 | 3735  | Other infective dermatitis of eyelid                                                                                       | 3738  | Other inflammations of eyelids                                                                                  | Other inflammations of eyelids                                                                  | Eyelid conditions                           | True  | 37332 | Contact and allergic dermatitis of eyelid                                                                                       | Contact and allergic dermatitis of eyelid                                                                                       | Dermatitis of eyelid                                           | True  |
| 55 | 74904 | Cleft palate, bilateral, incomplete                                                                                        | 7491  | Cleft lip                                                                                                       |                                                                                                 | nan                                         | True  | 74924 | Cleft palate with cleft lip, bilateral, incomplete                                                                              | Cleft palate with cleft lip, bilateral, incomplete                                                                              | Cleft palate, bilateral, incomplete                            | True  |
| 56 | E8143 | Motor vehicle traffic accident involving collision with pedestrian injuring passenger on motorcycle                        | E8127 | Other motor vehicle traffic accident involving collision with motor vehicle injuring pedestrian                 | Other motor vehicle traffic accident involving collision with motor vehicle injuring pedestrian | Motor vehicle accident involving pedestrian | False | E8126 | Other motor vehicle traffic accident involving collision with motor vehicle injuring pedal cyclist                              | Other motor vehicle traffic accident involving collision with motor vehicle injuring pedal cyclist                              | Motor vehicle accident involving individual outside of vehicle | False |
| 57 | 34120 | Acute (transverse) myelitis NOS                                                                                            | 3239  | Unspecified causes of encephalitis, myelitis, and encephalomyelitis                                             | Unspecified causes of encephalitis, myelitis, and encephalomyelitis                             | Myelitis                                    | False | 3239  | Unspecified causes of encephalitis, myelitis, and encephalomyelitis                                                             | Unspecified causes of encephalitis, myelitis, and encephalomyelitis                                                             | Myelitis                                                       | False |
| 58 | 38844 | Auditory recruitment                                                                                                       | 38845 | Acquired auditory processing disorder                                                                           | Acquired auditory processing disorder                                                           | Auditory disorder                           | True  | 38842 | Hyperacusis                                                                                                                     | Hyperacusis                                                                                                                     | Auditory disorder                                              | True  |

|    |       |                                                                                  |       |                                                                                                                           |                                                                                  |                                             |       |       |                                                                                                                           |                                                                                         |                                      |       |
|----|-------|----------------------------------------------------------------------------------|-------|---------------------------------------------------------------------------------------------------------------------------|----------------------------------------------------------------------------------|---------------------------------------------|-------|-------|---------------------------------------------------------------------------------------------------------------------------|-----------------------------------------------------------------------------------------|--------------------------------------|-------|
| 59 | 9987  | Acute reaction to foreign substance accidentally left during a procedure         | 9987  | Acute reaction to foreign substance accidentally left during a procedure                                                  | Acute reaction to foreign substance accidentally left during a procedure         | Exact Match                                 | True  | 9984  | Foreign body accidentally left during a procedure                                                                         | Foreign body accidentally left during a procedure                                       | Procedure complication               | True  |
| 60 | 417   | Pseudomonas infection in conditions classified elsewhere and of unspecified site | 417   | Pseudomonas infection in conditions classified elsewhere and of unspecified site; Other diseases of pulmonary circulation | Pseudomonas infection in conditions classified elsewhere and of unspecified site | Exact Match                                 | True  | 417   | Pseudomonas infection in conditions classified elsewhere and of unspecified site; Other diseases of pulmonary circulation | Pseudomonas infection in conditions classified elsewhere and of unspecified site        | Exact Match                          | True  |
| 61 | 7709  | Unspecified respiratory condition of fetus and newborn                           | 7709  | Unspecified respiratory condition of fetus and newborn                                                                    | Unspecified respiratory condition of fetus and newborn                           | Exact Match                                 | True  | 7708  | Other newborn respiratory problems                                                                                        |                                                                                         | nan                                  | True  |
| 62 | 9511  | Injury to trochlear nerve                                                        | 9515  | Injury to acoustic nerve                                                                                                  | Injury to acoustic nerve                                                         | Nerve injuries                              | True  | 37681 | Orbital cysts                                                                                                             | Orbital cysts                                                                           | nan                                  | False |
| 63 | V1240 | Personal history of unspecified disorder of nervous system and sense organs      | V1259 | Personal history of other diseases of circulatory system                                                                  | Personal history of other diseases of circulatory system                         | nan                                         | False | V158  | Other specified personal history presenting hazards to health                                                             |                                                                                         | nan                                  | False |
| 64 | 70713 | Ulcer of ankle                                                                   | 70715 | Ulcer of other part of foot                                                                                               | Ulcer of other part of foot                                                      | Ankle or foot ulcer                         | True  | 70712 | Ulcer of calf                                                                                                             | Ulcer of calf                                                                           | Lower limb ulcer                     | True  |
| 65 | 2532  | Panhypopituitarism                                                               | 2532  | Panhypopituitarism                                                                                                        | Panhypopituitarism                                                               | Exact Match                                 | True  | 2534  | Other anterior pituitary disorders                                                                                        | Other anterior pituitary disorders                                                      | Pituitary disorder                   | True  |
| 66 | 7104  | Polymyositis                                                                     | 7104  | Polymyositis                                                                                                              | Polymyositis                                                                     | Exact Match                                 | True  | 7104  | Polymyositis                                                                                                              | Polymyositis                                                                            | Exact Match                          | True  |
| 67 | 42789 | Other specified cardiac dysrhythmias                                             | 42789 | Other specified cardiac dysrhythmias                                                                                      | Other specified cardiac dysrhythmias                                             | Exact Match                                 | True  | 42789 | Other specified cardiac dysrhythmias                                                                                      | Other specified cardiac dysrhythmias                                                    | Exact Match                          | True  |
| 68 | 48230 | Pneumonia due to Streptococcus, unspecified                                      | 481   | Pneumococcal pneumonia [Streptococcus pneumoniae pneumonia]                                                               | Pneumococcal pneumonia [Streptococcus pneumoniae pneumonia]                      | Streptococcal Pneumonia                     | True  | 481   | Pneumococcal pneumonia [Streptococcus pneumoniae pneumonia]                                                               | Pneumococcal pneumonia [Streptococcus pneumoniae pneumonia]                             | Streptococcal Pneumonia              | True  |
| 69 | 36061 | Foreign body in anterior chamber                                                 | 36063 | Foreign body in lens                                                                                                      | Foreign body in lens                                                             | Foreign body in eye                         | True  | 36021 | Progressive high (degenerative) myopia                                                                                    | Progressive high (degenerative) myopia                                                  | Eye disorder                         | True  |
| 70 | V6282 | Bereavement, uncomplicated                                                       | V6282 | Bereavement, uncomplicated                                                                                                | Bereavement, uncomplicated                                                       | Exact Match                                 | True  | V6282 | Bereavement, uncomplicated                                                                                                | Bereavement, uncomplicated                                                              | Exact Match                          | True  |
| 71 | V5872 | Aftercare following surgery of the nervous system, NEC                           | V5872 | Aftercare following surgery of the nervous system, NEC                                                                    | Aftercare following surgery of the nervous system, NEC                           | Exact Match                                 | True  | V5889 | Other specified aftercare                                                                                                 | Other specified aftercare                                                               | Aftercare following surgery          | False |
| 72 | 52340 | Chronic periodontitis, unspecified                                               | 5234  | Chronic periodontitis                                                                                                     |                                                                                  | nan                                         | True  | 523   | Gingival and periodontal diseases                                                                                         |                                                                                         | nan                                  | True  |
| 73 | 9852  | Toxic effect of manganese and its compounds                                      | 985   | Gonococcal infection of joint; Toxic effect of other metals                                                               |                                                                                  | nan                                         | True  | 9851  | Gonococcal synovitis and tenosynovitis; Toxic effect of arsenic and its compounds                                         | Toxic effect of arsenic and its compounds                                               | Metal toxicosis                      | True  |
| 74 | V1324 | Personal history of vulvar dysplasia                                             | V1329 | Personal history of other genital system and obstetric disorders                                                          | Personal history of other genital system and obstetric disorders                 | Personal history of genital system disorder | True  | V1389 | Personal history of other specified diseases                                                                              | Personal history of other specified diseases                                            | nan                                  | False |
| 75 | 73082 | Other infections involving bone in diseases classified elsewhere, upper arm      | 73021 | Unspecified osteomyelitis, shoulder region                                                                                | Unspecified osteomyelitis, shoulder region                                       | Bone infections, upper limb/shoulder        | False | 73028 | Unspecified osteomyelitis, other specified sites                                                                          | Unspecified osteomyelitis, other specified sites                                        | Bone infections                      | False |
| 76 | 1902  | Malignant neoplasm of lacrimal gland                                             | 1906  | Malignant neoplasm of choroid                                                                                             | Malignant neoplasm of choroid                                                    | Malignant neoplasm of eye                   | True  | 193   | Malignant neoplasm of thyroid gland                                                                                       | Malignant neoplasm of thyroid gland                                                     | nan                                  | True  |
| 77 | 27401 | Acute gouty arthropathy                                                          | 27401 | Acute gouty arthropathy                                                                                                   | Acute gouty arthropathy                                                          | Exact Match                                 | True  | 274   | Gout                                                                                                                      |                                                                                         | nan                                  | True  |
| 78 | 2922  | Pathological drug intoxication                                                   | 2929  | Unspecified drug-induced mental disorder                                                                                  | Unspecified drug-induced mental disorder                                         | Drug-related change in mental status        | True  | 2929  | Unspecified drug-induced mental disorder                                                                                  | Unspecified drug-induced mental disorder                                                | Drug-related change in mental status | True  |
| 79 | 76514 | Other preterm infants, 1,000-1,249 grams                                         | 76524 | 27-28 completed weeks of gestation                                                                                        | 27-28 completed weeks of gestation                                               | Premature birth                             | True  | V3012 |                                                                                                                           |                                                                                         | nan                                  | False |
| 80 | 96900 | Poisoning by antidepressant, unspecified                                         | 969   | Poisoning by psychotropic agents                                                                                          |                                                                                  | nan                                         | True  | 9699  | Poisoning by unspecified psychotropic agent                                                                               | Poisoning by unspecified psychotropic agent                                             | Psychotropic-induced poisoning       | True  |
| 81 | 9171  | Abrasion or friction burn of foot and toe(s), infected                           | 9447  |                                                                                                                           |                                                                                  | nan                                         | False | 9178  | Other and unspecified superficial injury of foot and toes, without mention of infection                                   | Other and unspecified superficial injury of foot and toes, without mention of infection | Foot and toe injuries                | True  |
| 82 | 94407 | Burn of unspecified degree of wrist                                              | 94427 | Blisters, epidermal loss [second degree] of wrist                                                                         | Blisters, epidermal loss [second degree] of wrist                                | Wrist burn injury                           | True  | 9412  | Blisters with epidermal loss due to burn [second degree] of face, head, and neck                                          |                                                                                         | nan                                  | False |
| 83 | 7675  | Facial nerve injury due to birth trauma                                          | 7676  | Injury to brachial plexus due to birth trauma                                                                             | Injury to brachial plexus due to birth trauma                                    | Birth trauma injury                         | True  | 7674  | Injury to spine and spinal cord due to birth trauma                                                                       | Injury to spine and spinal cord due to birth trauma                                     | Nerve injury due to birth trauma     | True  |

|     |       |                                                                                                                                                 |       |                                                                                                                                              |                                                                                                                                              |                                            |       |       |                                                                                                           |                                                                                                           |                                  |       |
|-----|-------|-------------------------------------------------------------------------------------------------------------------------------------------------|-------|----------------------------------------------------------------------------------------------------------------------------------------------|----------------------------------------------------------------------------------------------------------------------------------------------|--------------------------------------------|-------|-------|-----------------------------------------------------------------------------------------------------------|-----------------------------------------------------------------------------------------------------------|----------------------------------|-------|
| 84  | 69514 | Stevens-Johnson syndrome-toxic epidermal necrolysis overlap syndrome                                                                            | 69515 | Toxic epidermal necrolysis                                                                                                                   | Toxic epidermal necrolysis                                                                                                                   | Toxic epidermal necrolysis                 | True  | 69514 | Stevens-Johnson syndrome-toxic epidermal necrolysis overlap syndrome                                      | Stevens-Johnson syndrome-toxic epidermal necrolysis overlap syndrome                                      | Exact Match                      | True  |
| 85  | 86610 | Injury to kidney with open wound into cavity, unspecified injury                                                                                | 866   | Enteritis due to astrovirus; Injury to kidney                                                                                                |                                                                                                                                              | nan                                        | True  | 866   | Enteritis due to astrovirus; Injury to kidney                                                             |                                                                                                           | nan                              | True  |
| 86  | 1322  | Tuberculoma of brain, bacteriological or histological examination unknown (at present)                                                          | 13    | Tuberculosis of meninges and central nervous system                                                                                          |                                                                                                                                              | nan                                        | True  | 13    | Tuberculosis of meninges and central nervous system                                                       |                                                                                                           | nan                              | True  |
| 87  | E9914 | Injury due to war operations by fragments from munitions                                                                                        | E9981 | Injury due to war operations but occurring after cessation of hostilities by explosion of bombs                                              | Injury due to war operations but occurring after cessation of hostilities by explosion of bombs                                              | War-related injury                         | False | E9880 | Injury by jumping or lying before moving object, undetermined whether accidentally or purposely inflicted | Injury by jumping or lying before moving object, undetermined whether accidentally or purposely inflicted | nan                              | False |
| 88  | E9492 | Typhus vaccine causing adverse effects in therapeutic use                                                                                       | 99529 | Unspecified adverse effect of other drug, medicinal and biological substance                                                                 | Unspecified adverse effect of other drug, medicinal and biological substance                                                                 | Adverse drug event                         | False | 99949 | Anaphylactic reaction due to other serum                                                                  | Anaphylactic reaction due to other serum                                                                  | Adverse drug event               | False |
| 89  | 20916 | Malignant carcinoid tumor of the sigmoid colon                                                                                                  | 20925 | Malignant carcinoid tumor of foregut, not otherwise specified                                                                                | Malignant carcinoid tumor of foregut, not otherwise specified                                                                                | Malignant gastrointestinal carcinoid tumor | False | 20952 | Benign carcinoid tumor of the cecum                                                                       | Benign carcinoid tumor of the cecum                                                                       | Gastrointestinal carcinoid tumor | False |
| 90  | V5971 | Egg (oocyte) (ovum) donor, under age 35, anonymous recipient                                                                                    | V2631 | Testing of female for genetic disease carrier status                                                                                         | Testing of female for genetic disease carrier status                                                                                         | nan                                        | False | V2621 | Fertility testing                                                                                         | Fertility testing                                                                                         | nan                              | False |
| 91  | 8870  | Traumatic amputation of arm and hand (complete) (partial), unilateral, below elbow, without mention of complication                             | 887   | Traumatic amputation of arm and hand (complete) (partial)                                                                                    |                                                                                                                                              | nan                                        | True  | 887   | Traumatic amputation of arm and hand (complete) (partial)                                                 |                                                                                                           | nan                              | True  |
| 92  | 5644  | Other postoperative functional disorders                                                                                                        | 9979  | Complications affecting other specified body systems, not elsewhere classified                                                               |                                                                                                                                              | nan                                        | False | 99739 | Other respiratory complications                                                                           | Other respiratory complications                                                                           | Postoperative complications      | False |
| 93  | 23989 | Neoplasms of unspecified nature, other specified sites                                                                                          | 23989 | Neoplasms of unspecified nature, other specified sites                                                                                       | Neoplasms of unspecified nature, other specified sites                                                                                       | Exact Match                                | True  | 2399  | Neoplasm of unspecified nature, site unspecified                                                          | Neoplasm of unspecified nature, site unspecified                                                          | Unspecified neoplasms            | True  |
| 94  | 1005  | Primary tuberculous infection, tubercle bacilli not found by bacteriological examination, but tuberculosis confirmed histologically             | 1085  | Other primary progressive tuberculosis, tubercle bacilli not found by bacteriological examination, but tuberculosis confirmed histologically | Other primary progressive tuberculosis, tubercle bacilli not found by bacteriological examination, but tuberculosis confirmed histologically | Primary tuberculosis                       | True  | 101   | Tuberculous pleurisy in primary progressive tuberculosis; Vincent's angina                                | Vincent's angina                                                                                          | nan                              | True  |
| 95  | 1655  | Tuberculosis of other male genital organs, tubercle bacilli not found by bacteriological examination, but tuberculosis confirmed histologically | 169   | Genitourinary tuberculosis, unspecified                                                                                                      |                                                                                                                                              | nan                                        | True  | 167   | Tuberculosis of other female genital organs                                                               |                                                                                                           | nan                              | True  |
| 96  | 5739  | Unspecified disorder of liver                                                                                                                   | 5739  | Unspecified disorder of liver                                                                                                                | Unspecified disorder of liver                                                                                                                | Exact Match                                | True  | 5739  | Unspecified disorder of liver                                                                             | Unspecified disorder of liver                                                                             | Exact Match                      | True  |
| 97  | 9771  | Poisoning by lipotropic drugs                                                                                                                   | 9778  | Poisoning by other specified drugs and medicinal substances                                                                                  | Poisoning by other specified drugs and medicinal substances                                                                                  | Drug poisoning                             | True  | 9655  | Poisoning by pyrazole derivatives                                                                         | Poisoning by pyrazole derivatives                                                                         | nan                              | False |
| 98  | 6823  | Cellulitis and abscess of upper arm and forearm                                                                                                 | 6823  | Cellulitis and abscess of upper arm and forearm                                                                                              | Cellulitis and abscess of upper arm and forearm                                                                                              | Exact Match                                | True  | 6824  | Cellulitis and abscess of hand, except fingers and thumb                                                  | Cellulitis and abscess of hand, except fingers and thumb                                                  | nan                              | True  |
| 99  | 94412 | Erythema [first degree] of thumb (nail)                                                                                                         | 94402 | Burn of unspecified degree of thumb (nail)                                                                                                   | Burn of unspecified degree of thumb (nail)                                                                                                   | Thumb burn injury                          | True  | 692   | Contact dermatitis and other eczema                                                                       |                                                                                                           | nan                              | False |
| 100 | 30722 | Chronic motor or vocal tic disorder                                                                                                             | 30723 | Tourette's disorder                                                                                                                          | Tourette's disorder                                                                                                                          | Tic disorder                               | True  | 30721 | Transient tic disorder                                                                                    | Transient tic disorder                                                                                    | Tic disorders                    | True  |

Supplementary Table 2: Code-level generated outputs and similarity for ICD-10-CM

| Case | Original ICD-10-CM code | Original ICD-10-CM code description                                                                                                             | GPT-4 Code | Description matching GPT-4 code                                                                                         | Description matching billable GPT-4 code                                                                                | GPT-4 code semantic similarity                                                          | GPT-4 code syntactic similarity | GPT-3.5 Code | Description matching GPT-3.5 code                                                                                  | Description matching billable GPT-3.5 code                                                                         | GPT-3.5 code semantic similarity                                    | GPT-3.5 code syntactic similarity |
|------|-------------------------|-------------------------------------------------------------------------------------------------------------------------------------------------|------------|-------------------------------------------------------------------------------------------------------------------------|-------------------------------------------------------------------------------------------------------------------------|-----------------------------------------------------------------------------------------|---------------------------------|--------------|--------------------------------------------------------------------------------------------------------------------|--------------------------------------------------------------------------------------------------------------------|---------------------------------------------------------------------|-----------------------------------|
| 1    | S82433B                 | Displaced oblique fracture of shaft of unspecified fibula, initial encounter for open fracture type I or II                                     | S82401B    | Unspecified fracture of shaft of right fibula, initial encounter for open fracture type I or II                         | Unspecified fracture of shaft of right fibula, initial encounter for open fracture type I or II                         | Fibula fracture, initial encounter                                                      | False                           | S82424A      | Nondisplaced transverse fracture of shaft of right fibula, initial encounter for closed fracture                   | Nondisplaced transverse fracture of shaft of right fibula, initial encounter for closed fracture                   | Fibula fracture, initial encounter                                  | False                             |
| 2    | S82035B                 | Nondisplaced transverse fracture of left patella, initial encounter for open fracture type I or II                                              | S82112B    | Displaced fracture of left tibial spine, initial encounter for open fracture type I or II                               | Displaced fracture of left tibial spine, initial encounter for open fracture type I or II                               | Fracture of knee joint bones, initial encounter                                         | False                           | S82102A      | Unspecified fracture of upper end of left tibia, initial encounter for closed fracture                             | Unspecified fracture of upper end of left tibia, initial encounter for closed fracture                             | Fracture of knee joint bones, initial encounter                     | False                             |
| 3    | S72444P                 | Nondisplaced fracture of lower epiphysis (separation) of right femur, subsequent encounter for closed fracture with malunion                    | S72353K    | Displaced comminuted fracture of shaft of unspecified femur, subsequent encounter for closed fracture with nonunion     | Displaced comminuted fracture of shaft of unspecified femur, subsequent encounter for closed fracture with nonunion     | Femur fracture, subsequent encounter                                                    | False                           | S72113S      | Displaced fracture of greater trochanter of unspecified femur, sequela                                             | Displaced fracture of greater trochanter of unspecified femur, sequela                                             | Femur fracture                                                      | False                             |
| 4    | M8450XP                 | Pathological fracture in neoplastic disease, unspecified site, subsequent encounter for fracture with malunion                                  | M8450K     |                                                                                                                         |                                                                                                                         | nan                                                                                     | True                            | M8440XS      | Pathological fracture, unspecified site, sequela                                                                   | Pathological fracture, unspecified site, sequela                                                                   | Pathological fracture                                               | False                             |
| 5    | S62301D                 | Unspecified fracture of second metacarpal bone, left hand, subsequent encounter for fracture with routine healing                               | S62522D    | Displaced fracture of distal phalanx of left thumb, subsequent encounter for fracture with routine healing              | Displaced fracture of distal phalanx of left thumb, subsequent encounter for fracture with routine healing              | Left hand fracture with routine healing, subsequent encounter                           | False                           | S62352S      | Nondisplaced fracture of shaft of third metacarpal bone, right hand, sequela                                       | Nondisplaced fracture of shaft of third metacarpal bone, right hand, sequela                                       | Metacarpal fracture with routine healing                            | False                             |
| 6    | S72362N                 | Displaced segmental fracture of shaft of left femur, subsequent encounter for open fracture type IIIA, IIIB, or IIIC with nonunion              | S72352M    | Displaced comminuted fracture of shaft of left femur, subsequent encounter for open fracture type I or II with nonunion | Displaced comminuted fracture of shaft of left femur, subsequent encounter for open fracture type I or II with nonunion | Open fracture of the left femur with nonunion, subsequent encounter                     | False                           | S72342K      | Displaced spiral fracture of shaft of left femur, subsequent encounter for closed fracture with nonunion           | Displaced spiral fracture of shaft of left femur, subsequent encounter for closed fracture with nonunion           | Fracture of the left femur with nonunion, subsequent encounter      | False                             |
| 7    | I82401                  | Acute embolism and thrombosis of unspecified deep veins of right lower extremity                                                                | I82409     | Acute embolism and thrombosis of unspecified deep veins of unspecified lower extremity                                  | Acute embolism and thrombosis of unspecified deep veins of unspecified lower extremity                                  | Acute embolism and thrombosis of deep veins of lower extremity                          | True                            | I82609       | Acute embolism and thrombosis of unspecified upper extremity                                                       | Acute embolism and thrombosis of unspecified veins of unspecified upper extremity                                  | Acute embolism and thrombosis of deep veins                         | False                             |
| 8    | S52552F                 | Other extraarticular fracture of lower end of left radius, subsequent encounter for open fracture type IIIA, IIIB, or IIIC with routine healing | S52526D    |                                                                                                                         |                                                                                                                         | nan                                                                                     | False                           | S52309D      | Unspecified fracture of shaft of unspecified radius, subsequent encounter for closed fracture with routine healing | Unspecified fracture of shaft of unspecified radius, subsequent encounter for closed fracture with routine healing | Radius fracture with routine healing, subsequent encounter          | False                             |
| 9    | S86391S                 | Other injury of muscle(s) and tendon(s) of peroneal muscle group at lower leg level, right leg, sequela                                         | S86891S    | Other injury of other muscle(s) and tendon(s) at lower leg level, right leg, sequela                                    | Other injury of other muscle(s) and tendon(s) at lower leg level, right leg, sequela                                    | Other injury of other muscle(s) and tendon(s) at lower leg level, right leg, sequela    | True                            | S86829S      | Laceration of other muscle(s) and tendon(s) at lower leg level, unspecified leg, sequela                           | Laceration of other muscle(s) and tendon(s) at lower leg level, unspecified leg, sequela                           | Injury of other muscle(s) and tendon(s) at lower leg level, sequela | False                             |
| 10   | V8082XS                 | Occupant of animal-drawn vehicle injured in collision with fixed or stationary object, sequela                                                  | V80719S    |                                                                                                                         |                                                                                                                         | nan                                                                                     | False                           | V819XXS      | Occupant of railway train or railway vehicle injured in unspecified railway accident, sequela                      | Occupant of railway train or railway vehicle injured in unspecified railway accident, sequela                      | Injury related to vehicular accident                                | False                             |
| 11   | S96992S                 | Other specified injury of unspecified muscle and tendon at ankle and foot level, left foot, sequela                                             | S96892S    | Other specified injury of other specified muscles and tendons at ankle and foot level, left foot, sequela               | Other specified injury of other specified muscles and tendons at ankle and foot level, left foot, sequela               | Other specified injury of muscle and tendon at ankle and foot level, left foot, sequela | True                            | S99892S      |                                                                                                                    |                                                                                                                    | nan                                                                 | False                             |
| 12   | S20461A                 | Insect bite (nonvenomous) of right back wall of thorax, initial encounter                                                                       | S20319A    | Abrasion of unspecified front wall of thorax, initial encounter                                                         | Abrasion of unspecified front wall of thorax, initial encounter                                                         | nan                                                                                     | False                           | S30824A      | Blister (nonthermal) of vagina and vulva, initial encounter                                                        | Blister (nonthermal) of vagina and vulva, initial encounter                                                        | nan                                                                 | False                             |
| 13   | M5116                   | Intervertebral disc disorders with radiculopathy, lumbar region                                                                                 | M5116      | Intervertebral disc disorders with radiculopathy, lumbar region                                                         | Intervertebral disc disorders with radiculopathy, lumbar region                                                         | Exact Match                                                                             | True                            | M5116        | Intervertebral disc disorders with radiculopathy, lumbar region                                                    | Intervertebral disc disorders with radiculopathy, lumbar region                                                    | Exact Match                                                         | True                              |

|    |         |                                                                                                                                  |         |                                                                                                       |                                                                                                       |                                                                                              |       |         |                                                                                                                                          |                                                                                                                                          |                                                                                                 |       |
|----|---------|----------------------------------------------------------------------------------------------------------------------------------|---------|-------------------------------------------------------------------------------------------------------|-------------------------------------------------------------------------------------------------------|----------------------------------------------------------------------------------------------|-------|---------|------------------------------------------------------------------------------------------------------------------------------------------|------------------------------------------------------------------------------------------------------------------------------------------|-------------------------------------------------------------------------------------------------|-------|
| 14 | Y93B1   | Activity, exercise machines primarily for muscle strengthening                                                                   | Y9364   | Activity, softball                                                                                    | Activity, baseball                                                                                    | Physical activities                                                                          | False | Z742    | Need for assistance at home and no other household member able to render care                                                            | Need for assistance at home and no other household member able to render care                                                            | nan                                                                                             | False |
| 15 | D3A023  | Benign carcinoid tumor of the transverse colon                                                                                   | D3A020  | Benign carcinoid tumor of the appendix                                                                | Benign carcinoid tumor of the appendix                                                                | Benign carcinoid tumors of lower gastrointestinal tract                                      | True  | D3A00   | Benign carcinoid tumor of unspecified site                                                                                               | Benign carcinoid tumor of unspecified site                                                                                               | Benign carcinoid tumor                                                                          | True  |
| 16 | T462X6S | Underdosing of other antidyrrhythmic drugs, sequela                                                                              | T461X5S | Adverse effect of calcium-channel blockers, sequela                                                   | Adverse effect of calcium-channel blockers, sequela                                                   | nan                                                                                          | False | T468X5S | Adverse effect of antivaricose drugs, including sclerosing agents, sequela                                                               | Adverse effect of antivaricose drugs, including sclerosing agents, sequela                                                               | nan                                                                                             | False |
| 17 | T398X3A | Poisoning by other nonopioid analgesics and antipyretics, not elsewhere classified, assault, initial encounter                   | T39095A | Adverse effect of salicylates, initial encounter                                                      | Adverse effect of salicylates, initial encounter                                                      | Anelgesic-related adverse event, initial encounter                                           | False | X424XXA |                                                                                                                                          |                                                                                                                                          | nan                                                                                             | False |
| 18 | S52102S | Unspecified fracture of upper end of left radius, sequela                                                                        | S52502S | Unspecified fracture of the lower end of left radius, sequela                                         | Unspecified fracture of the lower end of left radius, sequela                                         | Unspecified fracture of the left radius, sequela                                             | True  | S5232XS |                                                                                                                                          |                                                                                                                                          | nan                                                                                             | False |
| 19 | T63043A | Toxic effect of cobra venom, assault, initial encounter                                                                          | T630X2A |                                                                                                       |                                                                                                       | nan                                                                                          | False | T63121A | Toxic effect of venom of other venomous lizard, accidental (unintentional), initial encounter                                            | Toxic effect of venom of other venomous lizard, accidental (unintentional), initial encounter                                            | Toxic effect of venom, initial encounter                                                        | False |
| 20 | W5913XA | Crushed by nonvenomous snake, initial encounter                                                                                  | W5922XA | Struck by turtle, initial encounter                                                                   | Struck by turtle, initial encounter                                                                   | Mechanical injury by animal, initial encounter                                               | False | W5912XA | Struck by nonvenomous snake, initial encounter                                                                                           | Struck by nonvenomous snake, initial encounter                                                                                           | Mechanical injury by snake, initial encounter                                                   | True  |
| 21 | C969    | Malignant neoplasm of lymphoid, hematopoietic and related tissue, unspecified                                                    | C859    | Lymphoma NOS                                                                                          |                                                                                                       | nan                                                                                          | False | C969    | Malignant neoplasm of lymphoid, hematopoietic and related tissue, unspecified                                                            | Malignant neoplasm of lymphoid, hematopoietic and related tissue, unspecified                                                            | Exact Match                                                                                     | True  |
| 22 | S62234B | Other nondisplaced fracture of base of first metacarpal bone, right hand, initial encounter for open fracture                    | S62241B | Displaced fracture of shaft of first metacarpal bone, right hand, initial encounter for open fracture | Displaced fracture of shaft of first metacarpal bone, right hand, initial encounter for open fracture | Fracture of the first metacarpal bone in the right hand, initial encounter for open fracture | False | S62414A |                                                                                                                                          |                                                                                                                                          | nan                                                                                             | False |
| 23 | S63427A | Traumatic rupture of palmar ligament of left little finger at metacarpophalangeal and interphalangeal joint, initial encounter   | S63625A |                                                                                                       |                                                                                                       | nan                                                                                          | False | S63664A |                                                                                                                                          |                                                                                                                                          | nan                                                                                             | False |
| 24 | V5910XA | Passenger in pick-up truck or van injured in collision with unspecified motor vehicles in nontraffic accident, initial encounter | V877XXA | Person injured in collision between other specified motor vehicles (traffic), initial encounter       | Person injured in collision between other specified motor vehicles (traffic), initial encounter       | Person injury in collision between motor vehicles, initial encounter                         | False | V579XXA | Unspecified occupant of pick-up truck or van injured in collision with fixed or stationary object in traffic accident, initial encounter | Unspecified occupant of pick-up truck or van injured in collision with fixed or stationary object in traffic accident, initial encounter | Occupant of pick-up truck or van injured in collision between motor vehicles, initial encounter | False |
| 25 | W9423XA | Exposure to sudden change in air pressure in aircraft during ascent, initial encounter                                           | W941XXA |                                                                                                       |                                                                                                       | nan                                                                                          | False | W940    | Exposure to prolonged high air pressure                                                                                                  |                                                                                                                                          | nan                                                                                             | True  |
| 26 | D030    | Melanoma in situ of lip                                                                                                          | D030    | Melanoma in situ of lip                                                                               | Melanoma in situ of lip                                                                               | Exact Match                                                                                  | True  | D0361   | Melanoma in situ of right upper limb, including shoulder                                                                                 | Melanoma in situ of right upper limb, including shoulder                                                                                 | Melanoma in situ                                                                                | True  |
| 27 | H01023  | Squamous blepharitis right eye, unspecified eyelid                                                                               | H01003  | Unspecified blepharitis right eye, unspecified eyelid                                                 | Unspecified blepharitis right eye, unspecified eyelid                                                 | Blepharitis right eye, unspecified eyelid                                                    | True  | H01139  | Eczematous dermatitis of unspecified eye, unspecified eyelid                                                                             | Eczematous dermatitis of unspecified eye, unspecified eyelid                                                                             | Eyelid conditions                                                                               | False |
| 28 | V2139XS | Person boarding or alighting other motorcycle injured in collision with pedal cycle, sequela                                     | V20421S |                                                                                                       |                                                                                                       | nan                                                                                          | False | V1940XA | Pedal cycle driver injured in collision with unspecified motor vehicles in traffic accident, initial encounter                           | Pedal cycle driver injured in collision with unspecified motor vehicles in traffic accident, initial encounter                           | Injury after collision of pedal cycle driver with vehicle                                       | False |
| 29 | S72353C | Displaced comminuted fracture of shaft of unspecified femur, initial encounter for open fracture type IIIA, IIIB, or IIIC        | S72901B |                                                                                                       |                                                                                                       | nan                                                                                          | False | S72301A | Unspecified fracture of shaft of right femur, initial encounter for closed fracture                                                      | Unspecified fracture of shaft of right femur, initial encounter for closed fracture                                                      | Femur fracture, initial encounter                                                               | False |

|    |         |                                                                                                                                  |         |                                                                                                                    |                                                                                                                    |                                                                                 |       |         |                                                                                            |                                                                                            |                                                                            |       |
|----|---------|----------------------------------------------------------------------------------------------------------------------------------|---------|--------------------------------------------------------------------------------------------------------------------|--------------------------------------------------------------------------------------------------------------------|---------------------------------------------------------------------------------|-------|---------|--------------------------------------------------------------------------------------------|--------------------------------------------------------------------------------------------|----------------------------------------------------------------------------|-------|
| 30 | S75102S | Unspecified injury of femoral vein at hip and thigh level, left leg, sequela                                                     | S75892S | Other specified injury of other blood vessels at hip and thigh level, left leg, sequela                            | Other specified injury of other blood vessels at hip and thigh level, left leg, sequela                            | Injury to blood vessel at hip and thigh level, left leg, sequela                | False | S35042S |                                                                                            |                                                                                            | nan                                                                        | False |
| 31 | S41102A | Unspecified open wound of left upper arm, initial encounter                                                                      | S41102A | Unspecified open wound of left upper arm, initial encounter                                                        | Unspecified open wound of left upper arm, initial encounter                                                        | Exact Match                                                                     | True  | S51111A |                                                                                            |                                                                                            | nan                                                                        | False |
| 32 | S022XXB | Fracture of nasal bones, initial encounter for open fracture                                                                     | S022XXB | Fracture of nasal bones, initial encounter for open fracture                                                       | Fracture of nasal bones, initial encounter for open fracture                                                       | Exact Match                                                                     | True  | S021XXA |                                                                                            |                                                                                            | nan                                                                        | False |
| 33 | M6289   | Other specified disorders of muscle                                                                                              | M6289   | Muscle (sheath) hernia                                                                                             | Other specified disorders of muscle                                                                                | Exact Match                                                                     | True  | M6289   | Muscle (sheath) hernia                                                                     | Other specified disorders of muscle                                                        | Exact Match                                                                | True  |
| 34 | S52334A | Nondisplaced oblique fracture of shaft of right radius, initial encounter for closed fracture                                    | S52321A | Displaced transverse fracture of shaft of right radius, initial encounter for closed fracture                      | Displaced transverse fracture of shaft of right radius, initial encounter for closed fracture                      | Closed fracture of the shaft of the right radius, initial encounter             | False | S52212A | Greenstick fracture of shaft of left ulna, initial encounter for closed fracture           | Greenstick fracture of shaft of left ulna, initial encounter for closed fracture           | Closed fracture of the shaft of the lower arm, initial encounter           | False |
| 35 | Q163    | Congenital malformation of ear ossicles                                                                                          | Q163    | Congenital fusion of ear ossicles                                                                                  | Congenital malformation of ear ossicles                                                                            | Exact Match                                                                     | True  | Q160    | Congenital absence of (ear) auricle                                                        | Congenital absence of (ear) auricle                                                        | Ear malformation                                                           | True  |
| 36 | S52225H | Nondisplaced transverse fracture of shaft of left ulna, subsequent encounter for open fracture type I or II with delayed healing | S52222D | Displaced transverse fracture of shaft of left ulna, subsequent encounter for closed fracture with routine healing | Displaced transverse fracture of shaft of left ulna, subsequent encounter for closed fracture with routine healing | Transverse fracture of the shaft of the left ulna, subsequent encounter         | False | S52212K | Greenstick fracture of shaft of left ulna, subsequent encounter for fracture with nonunion | Greenstick fracture of shaft of left ulna, subsequent encounter for fracture with nonunion | Fracture of the shaft of the left ulna, subsequent encounter               | False |
| 37 | Q175    | Prominent ear                                                                                                                    | H61109  | Unspecified noninfective disorders of pinna, unspecified ear                                                       | Unspecified noninfective disorders of pinna, unspecified ear                                                       | Ear condition                                                                   | False | Q173    | Pointed ear                                                                                | Other misshapen ear                                                                        | Ear deformities                                                            | True  |
| 38 | S86819S | Strain of other muscle(s) and tendon(s) at lower leg level, unspecified leg, sequela                                             | S86919S | Strain of unspecified muscle(s) and tendon(s) at lower leg level, unspecified leg, sequela                         | Strain of unspecified muscle(s) and tendon(s) at lower leg level, unspecified leg, sequela                         | Strain of muscles and tendons at lower leg level, unspecified leg, sequela      | True  | S86919S | Strain of unspecified muscle(s) and tendon(s) at lower leg level, unspecified leg, sequela | Strain of unspecified muscle(s) and tendon(s) at lower leg level, unspecified leg, sequela | Strain of muscles and tendons at lower leg level, unspecified leg, sequela | True  |
| 39 | S82152A | Displaced fracture of left tibial tuberosity, initial encounter for closed fracture                                              | S82122A | Displaced fracture of lateral condyle of left tibia, initial encounter for closed fracture                         | Displaced fracture of lateral condyle of left tibia, initial encounter for closed fracture                         | Displaced fracture of lateral left tibia, initial encounter for closed fracture | True  | S82202A | Unspecified fracture of shaft of left tibia, initial encounter for closed fracture         | Unspecified fracture of shaft of left tibia, initial encounter for closed fracture         | Displaced fracture of left tibia, initial encounter for closed fracture    | False |
| 40 | H4010X4 | Unspecified open-angle glaucoma, indeterminate stage                                                                             | H4011X0 |                                                                                                                    |                                                                                                                    | nan                                                                             | False | H4010X0 | Unspecified open-angle glaucoma, stage unspecified                                         | Unspecified open-angle glaucoma, stage unspecified                                         | Unspecified open-angle glaucoma, unclear stage                             | True  |
| 41 | T480X1S | Poisoning by oxytocic drugs, accidental (unintentional), sequela                                                                 | T384X1S | Poisoning by oral contraceptives, accidental (unintentional), sequela                                              | Poisoning by oral contraceptives, accidental (unintentional), sequela                                              | Poisoning by hormonal drugs                                                     | False | T485X6S | Underdosing of other anti-common-cold drugs, sequela                                       | Underdosing of other anti-common-cold drugs, sequela                                       | nan                                                                        | False |
| 42 | D483    | Neoplasm of uncertain behavior of retroperitoneum                                                                                | D483    | Neoplasm of uncertain behavior of retroperitoneum                                                                  | Neoplasm of uncertain behavior of retroperitoneum                                                                  | Exact Match                                                                     | True  | D481    | Neoplasm of uncertain behavior of connective and other soft tissue                         | Neoplasm of uncertain behavior of connective and other soft tissue                         | Neoplasm of uncertain behavior                                             | True  |
| 43 | T24609D | Corrosion of second degree of unspecified site of unspecified lower limb, except ankle and foot, subsequent encounter            | T24909D |                                                                                                                    |                                                                                                                    | nan                                                                             | True  | T24462S |                                                                                            |                                                                                            | nan                                                                        | False |
| 44 | T50B96S | Underdosing of other viral vaccines, sequela                                                                                     | T50B95S | Adverse effect of other viral vaccines, sequela                                                                    | Adverse effect of other viral vaccines, sequela                                                                    | Issues with viral vaccines, sequela                                             | True  | T8803XS |                                                                                            |                                                                                            | nan                                                                        | False |
| 45 | Q984    | Klinefelter syndrome, unspecified                                                                                                | Q989    | Sex chromosome abnormality, male phenotype, unspecified                                                            | Sex chromosome abnormality, male phenotype, unspecified                                                            | Male sex chromosome abnormalities                                               | True  | Q980    | Klinefelter syndrome karyotype 47, XXY                                                     | Klinefelter syndrome karyotype 47, XXY                                                     | Klinefelter syndrome                                                       | True  |
| 46 | E441    | Mild protein-calorie malnutrition                                                                                                | E440    | Moderate protein-calorie malnutrition                                                                              | Moderate protein-calorie malnutrition                                                                              | Protein-calorie malnutrition                                                    | True  | E43     | Unspecified severe protein-calorie malnutrition                                            | Unspecified severe protein-calorie malnutrition                                            | Protein-calorie malnutrition                                               | True  |
| 47 | S61232D | Puncture wound without foreign body of right middle finger without damage to nail, subsequent encounter                          | S61432D | Puncture wound without foreign body of left hand, subsequent encounter                                             | Puncture wound without foreign body of left hand, subsequent encounter                                             | Puncture wound without foreign body of hand, subsequent encounter               | True  | S61441D | Puncture wound with foreign body of right hand, subsequent encounter                       | Puncture wound with foreign body of right hand, subsequent encounter                       | Puncture wound of right hand, subsequent encounter                         | False |
| 48 | M23005  | Cystic meniscus, unspecified medial meniscus, unspecified knee                                                                   | M23859  |                                                                                                                    |                                                                                                                    | nan                                                                             | False | M2320   | Derangement of unspecified lateral meniscus due to old tear or injury                      |                                                                                            | nan                                                                        | True  |



|    |         |                                                                                                                                                                                  |         |                                                                                                                       |                                                                                                                       |                                                                                                                       |       |         |                                                                                                                                    |                                                                                                                                    |                                                                                                                          |       |
|----|---------|----------------------------------------------------------------------------------------------------------------------------------------------------------------------------------|---------|-----------------------------------------------------------------------------------------------------------------------|-----------------------------------------------------------------------------------------------------------------------|-----------------------------------------------------------------------------------------------------------------------|-------|---------|------------------------------------------------------------------------------------------------------------------------------------|------------------------------------------------------------------------------------------------------------------------------------|--------------------------------------------------------------------------------------------------------------------------|-------|
| 49 | S06365D | Traumatic hemorrhage of cerebrum, unspecified, with loss of consciousness greater than 24 hours with return to pre-existing conscious level, subsequent encounter                | S069X0S | Unspecified intracranial injury without loss of consciousness, sequela                                                | Unspecified intracranial injury without loss of consciousness, sequela                                                | Unspecified intracranial injury without loss of consciousness                                                         | False | S068X9S |                                                                                                                                    |                                                                                                                                    | nan                                                                                                                      | False |
| 50 | S72101H | Unspecified trochanteric fracture of right femur, subsequent encounter for open fracture type I or II with delayed healing                                                       | S7214XD |                                                                                                                       |                                                                                                                       | nan                                                                                                                   | False | S72145S | Nondisplaced intertrochanteric fracture of left femur, sequela                                                                     | Nondisplaced intertrochanteric fracture of left femur, sequela                                                                     | Femur fracture                                                                                                           | False |
| 51 | A403    | Sepsis due to Streptococcus pneumoniae                                                                                                                                           | A403    | Pneumococcal sepsis                                                                                                   | Sepsis due to Streptococcus pneumoniae                                                                                | Exact Match                                                                                                           | True  | A403    | Pneumococcal sepsis                                                                                                                | Sepsis due to Streptococcus pneumoniae                                                                                             | Exact Match                                                                                                              | True  |
| 52 | T23231S | Corrosion of first degree of back of unspecified hand, subsequent encounter                                                                                                      | T25011D | Burn of unspecified degree of right ankle, subsequent encounter                                                       | Burn of unspecified degree of right ankle, subsequent encounter                                                       | Burn injury, subsequent encounter                                                                                     | False | T23231S | Burn of second degree of multiple right fingers (nail), not including thumb, sequela                                               | Burn of second degree of multiple right fingers (nail), not including thumb, sequela                                               | Burn injury of hand                                                                                                      | False |
| 53 | T82321A | Displacement of carotid arterial graft (bypass), initial encounter                                                                                                               | T82858A | Stenosis of other vascular prosthetic devices, implants and grafts, initial encounter                                 | Stenosis of other vascular prosthetic devices, implants and grafts, initial encounter                                 | Vascular graft complication, initial encounter                                                                        | False | T82858A | Stenosis of other vascular prosthetic devices, implants and grafts, initial encounter                                              | Stenosis of other vascular prosthetic devices, implants and grafts, initial encounter                                              | Vascular graft complication, initial encounter                                                                           | False |
| 54 | S42424A | Nondisplaced comminuted supracondylar fracture without intercondylar fracture of right humerus, initial encounter for closed fracture                                            | S42454A | Nondisplaced fracture of lateral condyle of right humerus, initial encounter for closed fracture                      | Nondisplaced fracture of lateral condyle of right humerus, initial encounter for closed fracture                      | Nondisplaced fracture of right humerus, initial encounter for closed fracture                                         | True  | S42421A | Displaced comminuted supracondylar fracture without intercondylar fracture of right humerus, initial encounter for closed fracture | Displaced comminuted supracondylar fracture without intercondylar fracture of right humerus, initial encounter for closed fracture | Comminuted supracondylar fracture without intercondylar fracture of right humerus, initial encounter for closed fracture | True  |
| 55 | O3513X9 | Maternal care for (suspected) chromosomal abnormality in fetus, Trisomy 21, other fetus                                                                                          | O352X2  |                                                                                                                       |                                                                                                                       | nan                                                                                                                   | False | O357XX0 | Maternal care for (suspected) damage to fetus by other medical procedures, not applicable or unspecified                           | Maternal care for (suspected) damage to fetus by other medical procedures, not applicable or unspecified                           | Maternal care for suspected fetal condition                                                                              | False |
| 56 | H59323  | Postprocedural hemorrhage of eye and adnexa following other procedure, bilateral                                                                                                 | H59021  | Cataract (lens) fragments in eye following cataract surgery, right eye                                                | Cataract (lens) fragments in eye following cataract surgery, right eye                                                | Postprocedural complications in the eye                                                                               | False | H59023  | Cataract (lens) fragments in eye following cataract surgery, bilateral                                                             | Cataract (lens) fragments in eye following cataract surgery, bilateral                                                             | Postprocedural complications in bilateral eyes                                                                           | True  |
| 57 | V9137XA | Hit or struck by falling object due to accident to water-skis, initial encounter                                                                                                 | V9107XA | Burn due to water-skis on fire, initial encounter                                                                     | Burn due to water-skis on fire, initial encounter                                                                     | Injury related to water-skis, initial encounter                                                                       | True  | V9107XA | Burn due to water-skis on fire, initial encounter                                                                                  | Burn due to water-skis on fire, initial encounter                                                                                  | Injury related to water-skis, initial encounter                                                                          | True  |
| 58 | W5522XD | Struck by cow, subsequent encounter                                                                                                                                              | W5521XD | Bitten by cow, subsequent encounter                                                                                   | Bitten by cow, subsequent encounter                                                                                   | Injury related to cow, subsequent encounter                                                                           | True  | W5521XS | Bitten by cow, sequela                                                                                                             | Bitten by cow, sequela                                                                                                             | Injury related to cow, subsequent encounter                                                                              | False |
| 59 | S71141A | Puncture wound with foreign body, right thigh, initial encounter                                                                                                                 | S71141A | Puncture wound with foreign body, right thigh, initial encounter                                                      | Puncture wound with foreign body, right thigh, initial encounter                                                      | Exact Match                                                                                                           | True  | S81821A | Laceration with foreign body, right lower leg, initial encounter                                                                   | Laceration with foreign body, right lower leg, initial encounter                                                                   | Right lower leg injury with foreign body, initial encounter                                                              | False |
| 60 | E083543 | Diabetes mellitus due to underlying condition with proliferative diabetic retinopathy with combined traction retinal detachment and rhegmatogenous retinal detachment, bilateral | E083592 | Diabetes mellitus due to underlying condition with proliferative diabetic retinopathy without macular edema, left eye | Diabetes mellitus due to underlying condition with proliferative diabetic retinopathy without macular edema, left eye | Diabetes mellitus due to underlying condition with proliferative diabetic retinopathy without macular edema, left eye | False | E113510 |                                                                                                                                    |                                                                                                                                    | nan                                                                                                                      | False |
| 61 | P832    | Hydrops fetalis not due to hemolytic disease                                                                                                                                     | P832    | Hydrops fetalis NOS                                                                                                   | Hydrops fetalis not due to hemolytic disease                                                                          | Exact Match                                                                                                           | True  | P831    | Neonatal erythema toxicum                                                                                                          | Neonatal erythema toxicum                                                                                                          | Neonatal conditions                                                                                                      | True  |
| 62 | M05042  | Felty's syndrome, left hand                                                                                                                                                      | M05042  | Felty's syndrome, left hand                                                                                           | Felty's syndrome, left hand                                                                                           | Exact Match                                                                                                           | True  | M0502   | Felty's syndrome, elbow                                                                                                            |                                                                                                                                    | nan                                                                                                                      | True  |
| 63 | S66193S | Other injury of flexor muscle, fascia and tendon of left middle finger at wrist and hand level, sequela                                                                          | S56402S | Unspecified injury of extensor muscle, fascia and tendon of left index finger at forearm level, sequela               | Unspecified injury of extensor muscle, fascia and tendon of left index finger at forearm level, sequela               | Injury of left hand muscle, fascia and tendon, sequela                                                                | False | S66392S | Other injury of extensor muscle, fascia and tendon of right middle finger at wrist and hand level, sequela                         | Other injury of extensor muscle, fascia and tendon of right middle finger at wrist and hand level, sequela                         | Other injury of flexor muscle, fascia and tendon of left middle finger at wrist and hand level, sequela                  | False |
| 64 | S92023P | Displaced fracture of anterior process of unspecified calcaneus, subsequent encounter for fracture with malunion                                                                 | S92025P | Nondisplaced fracture of anterior process of left calcaneus, subsequent encounter for fracture with malunion          | Nondisplaced fracture of anterior process of left calcaneus, subsequent encounter for fracture with malunion          | Fracture of anterior process of calcaneus, subsequent encounter for fracture with malunion                            | True  | S92001S | Unspecified fracture of right calcaneus, sequela                                                                                   | Unspecified fracture of right calcaneus, sequela                                                                                   | Calcaneus fracture                                                                                                       | False |
| 65 | O98519  | Other viral diseases complicating pregnancy, unspecified trimester                                                                                                               | O9889X  |                                                                                                                       |                                                                                                                       | nan                                                                                                                   | False | O98819  | Other maternal infectious and parasitic diseases complicating pregnancy, unspecified trimester                                     | Other maternal infectious and parasitic diseases complicating pregnancy, unspecified trimester                                     | Infections complicated pregnancy                                                                                         | True  |

|    |         |                                                                                                                                            |         |                                                                                                             |                                                                                                             |                                                                                                     |       |         |                                                                                                                       |                                                                                                                       |                                                                                        |       |
|----|---------|--------------------------------------------------------------------------------------------------------------------------------------------|---------|-------------------------------------------------------------------------------------------------------------|-------------------------------------------------------------------------------------------------------------|-----------------------------------------------------------------------------------------------------|-------|---------|-----------------------------------------------------------------------------------------------------------------------|-----------------------------------------------------------------------------------------------------------------------|----------------------------------------------------------------------------------------|-------|
| 66 | W16721S | Jumping or diving from boat striking bottom causing drowning and submersion, sequela                                                       | V9027XS | Drowning and submersion due to falling or jumping from burning water-skis, sequela                          | Drowning and submersion due to falling or jumping from burning water-skis, sequela                          | Drowning and submersion, sequela                                                                    | False | W16021D | Fall into swimming pool striking bottom causing drowning and submersion, subsequent encounter                         | Fall into swimming pool striking bottom causing drowning and submersion, subsequent encounter                         | Strike pf bottom causing drowning and submersion, subsequent encounter                 | False |
| 67 | M86069  | Acute hematogenous osteomyelitis, unspecified tibia and fibula                                                                             | M86269  | Subacute osteomyelitis, unspecified tibia and fibula                                                        | Subacute osteomyelitis, unspecified tibia and fibula                                                        | Osteomyelitis, unspecified tibia and fibula                                                         | True  | M8689   |                                                                                                                       |                                                                                                                       | nan                                                                                    | False |
| 68 | S96891S | Other specified injury of other specified muscles and tendons at ankle and foot level, right foot, sequela                                 | S96419S |                                                                                                             |                                                                                                             | nan                                                                                                 | False | S99899S |                                                                                                                       |                                                                                                                       | nan                                                                                    | False |
| 69 | S82852D | Displaced trimalleolar fracture of left lower leg, subsequent encounter for closed fracture with routine healing                           | S82874D | Nondisplaced pilon fracture of right tibia, subsequent encounter for closed fracture with routine healing   | Nondisplaced pilon fracture of right tibia, subsequent encounter for closed fracture with routine healing   | Ankle fracture, subsequent encounter for closed fracture with routine healing                       | False | S82841K | Displaced bimalleolar fracture of right lower leg, subsequent encounter for closed fracture with nonunion             | Displaced bimalleolar fracture of right lower leg, subsequent encounter for closed fracture with nonunion             | Displaced right ankle fracture, subsequent encounter for closed fracture with nonunion | False |
| 70 | S8252XC | Displaced fracture of medial malleolus of left tibia, initial encounter for open fracture type IIIA, IIIB, or IIIC                         | S82852A | Displaced trimalleolar fracture of left lower leg, initial encounter for closed fracture                    | Displaced trimalleolar fracture of left lower leg, initial encounter for closed fracture                    | Displaced left ankle fracture, initial encounter for closed fracture                                | False | S82851A | Displaced trimalleolar fracture of right lower leg, initial encounter for closed fracture                             | Displaced trimalleolar fracture of right lower leg, initial encounter for closed fracture                             | Displaced ankle fracture, initial encounter for closed fracture                        | False |
| 71 | S4410XS | Injury of median nerve at upper arm level, unspecified arm, sequela                                                                        | S14109S | Unspecified injury at unspecified level of cervical spinal cord, sequela                                    | Unspecified injury at unspecified level of cervical spinal cord, sequela                                    | Unspecified nerve injury of the upper body, sequela                                                 | False | S44902S |                                                                                                                       |                                                                                                                       | nan                                                                                    | False |
| 72 | S53136D | Medial dislocation of unspecified ulnohumeral joint, subsequent encounter                                                                  | S53401D | Unspecified sprain of right elbow, subsequent encounter                                                     | Unspecified sprain of right elbow, subsequent encounter                                                     | Elbow injury                                                                                        | False | S53122S | Posterior subluxation of left ulnohumeral joint, sequela                                                              | Posterior subluxation of left ulnohumeral joint, sequela                                                              | Elbow injury                                                                           | False |
| 73 | T8202XA | Displacement of heart valve prosthesis, initial encounter                                                                                  | T8201XA | Breakdown (mechanical) of heart valve prosthesis, initial encounter                                         | Breakdown (mechanical) of heart valve prosthesis, initial encounter                                         | Heart valve prosthetic complications                                                                | True  | T827XXA | Infection and inflammatory reaction due to other cardiac and vascular devices, implants and grafts, initial encounter | Infection and inflammatory reaction due to other cardiac and vascular devices, implants and grafts, initial encounter | Heart valve prosthetic complications                                                   | False |
| 74 | S72472A | Torus fracture of lower end of left femur, initial encounter for closed fracture                                                           | S72352A | Displaced comminuted fracture of shaft of left femur, initial encounter for closed fracture                 | Displaced comminuted fracture of shaft of left femur, initial encounter for closed fracture                 | Left femur fracture, initial encounter for closed fracture                                          | False | S72141A | Displaced intertrochanteric fracture of right femur, initial encounter for closed fracture                            | Displaced intertrochanteric fracture of right femur, initial encounter for closed fracture                            | Femur fracture, initial encounter for closed fracture                                  | False |
| 75 | T522X4D | Toxic effect of homologues of benzene, undetermined, subsequent encounter                                                                  | T5291XD | Toxic effect of unspecified organic solvent, accidental (unintentional), subsequent encounter               | Toxic effect of unspecified organic solvent, accidental (unintentional), subsequent encounter               | Toxic effect of substance                                                                           | False | T523X5S |                                                                                                                       |                                                                                                                       | nan                                                                                    | False |
| 76 | D4412   | Neoplasm of uncertain behavior of left adrenal gland                                                                                       | D441    | Neoplasm of uncertain behavior of adrenal gland                                                             |                                                                                                             | nan                                                                                                 | True  | D442    | Neoplasm of uncertain behavior of parathyroid gland                                                                   | Neoplasm of uncertain behavior of parathyroid gland                                                                   | Neoplasm of uncertain behavior                                                         | True  |
| 77 | Q7101   | Congenital complete absence of right upper limb                                                                                            | Q7100   | Congenital complete absence of unspecified upper limb                                                       | Congenital complete absence of unspecified upper limb                                                       | Congenital absence of upper limb                                                                    | True  | Q7141   | Longitudinal reduction defect of right radius                                                                         | Longitudinal reduction defect of right radius                                                                         | Congenital right limb abnormalities                                                    | True  |
| 78 | S52355D | Nondisplaced comminuted fracture of shaft of radius, left arm, subsequent encounter for closed fracture with routine healing               | S52135D | Nondisplaced fracture of neck of left radius, subsequent encounter for closed fracture with routine healing | Nondisplaced fracture of neck of left radius, subsequent encounter for closed fracture with routine healing | Nondisplaced fracture of left radius, subsequent encounter for closed fracture with routine healing | False | S52311S | Greenstick fracture of shaft of radius, right arm, sequela                                                            | Greenstick fracture of shaft of radius, right arm, sequela                                                            | Radius fracture                                                                        | False |
| 79 | M1A2291 | Drug-induced chronic gout, unspecified elbow, with tophus (tophi)                                                                          | M1A4293 |                                                                                                             |                                                                                                             | nan                                                                                                 | False | M1A00X2 |                                                                                                                       |                                                                                                                       | nan                                                                                    | False |
| 80 | V2501XD | Electric (assisted) bicycle driver injured in collision with railway train or railway vehicle in nontraffic accident, subsequent encounter | V190XXD |                                                                                                             |                                                                                                             | nan                                                                                                 | False | V1886XS |                                                                                                                       |                                                                                                                       | nan                                                                                    | False |
| 81 | P093    | Abnormal findings on neonatal screening for congenital hematologic disorders                                                               | P559    | Hemolytic disease of newborn, unspecified                                                                   | Hemolytic disease of newborn, unspecified                                                                   | Neonatal hematologic disorders                                                                      | False | P599    | Neonatal jaundice, unspecified                                                                                        | Neonatal jaundice, unspecified                                                                                        | Neonatal disorders                                                                     | False |

|    |         |                                                                                                                                                         |         |                                                                                                                   |                                                                                                                   |                                                                                          |       |         |                                                                                                                       |                                                                                                                       |                                                                                          |       |
|----|---------|---------------------------------------------------------------------------------------------------------------------------------------------------------|---------|-------------------------------------------------------------------------------------------------------------------|-------------------------------------------------------------------------------------------------------------------|------------------------------------------------------------------------------------------|-------|---------|-----------------------------------------------------------------------------------------------------------------------|-----------------------------------------------------------------------------------------------------------------------|------------------------------------------------------------------------------------------|-------|
| 82 | S52241S | Displaced spiral fracture of shaft of ulna, right arm, sequela                                                                                          | S52215S |                                                                                                                   |                                                                                                                   | nan                                                                                      | False | S52312S | Greenstick fracture of shaft of radius, left arm, sequela                                                             | Greenstick fracture of shaft of radius, left arm, sequela                                                             | Lower arm fractures                                                                      | False |
| 83 | S62393B | Other fracture of third metacarpal bone, left hand, initial encounter for open fracture                                                                 | S62351A | Nondisplaced fracture of shaft of second metacarpal bone, left hand, initial encounter for closed fracture        | Nondisplaced fracture of shaft of second metacarpal bone, left hand, initial encounter for closed fracture        | Left metacarpal fracture, initial encounter for closed fracture                          | False | S6234XA |                                                                                                                       |                                                                                                                       | nan                                                                                      | False |
| 84 | D4121   | Neoplasm of uncertain behavior of right ureter                                                                                                          | D414    | Neoplasm of uncertain behavior of bladder                                                                         | Neoplasm of uncertain behavior of bladder                                                                         | Neoplasm of uncertain behavior, urinary system                                           | True  | D091    | Carcinoma in situ of other and unspecified urinary organs                                                             |                                                                                                                       | nan                                                                                      | False |
| 85 | I69351  | Hemiplegia and hemiparesis following cerebral infarction affecting right dominant side                                                                  | I69351  | Hemiplegia and hemiparesis following cerebral infarction affecting right dominant side                            | Hemiplegia and hemiparesis following cerebral infarction affecting right dominant side                            | Exact Match                                                                              | True  | I69351  | Hemiplegia and hemiparesis following cerebral infarction affecting right dominant side                                | Hemiplegia and hemiparesis following cerebral infarction affecting right dominant side                                | Exact Match                                                                              | True  |
| 86 | S52025D | Nondisplaced fracture of olecranon process without intraarticular extension of left ulna, subsequent encounter for closed fracture with routine healing | S52612D | Displaced fracture of left ulna styloid process, subsequent encounter for closed fracture with routine healing    | Displaced fracture of left ulna styloid process, subsequent encounter for closed fracture with routine healing    | Left ulna fracture, subsequent encounter for closed fracture with routine healing        | False | S52222S | Displaced transverse fracture of shaft of left ulna, sequela                                                          | Displaced transverse fracture of shaft of left ulna, sequela                                                          | Left ulna fracture, subsequent encounter for closed fracture with routine healing        | False |
| 87 | K51519  | Left sided colitis with unspecified complications                                                                                                       | K51812  | Other ulcerative colitis with intestinal obstruction                                                              | Other ulcerative colitis with intestinal obstruction                                                              | Colitis with complications                                                               | False | K51512  | Left sided colitis with intestinal obstruction                                                                        | Left sided colitis with intestinal obstruction                                                                        | Left sided colitis with complications                                                    | True  |
| 88 | S52511N | Displaced fracture of right radial styloid process, subsequent encounter for open fracture type IIIA, IIIB, or IIIC with nonunion                       | S52133K | Displaced fracture of neck of unspecified radius, subsequent encounter for closed fracture with nonunion          | Displaced fracture of neck of unspecified radius, subsequent encounter for closed fracture with nonunion          | Displaced fracture of radius, subsequent encounter for fracture with nonunion            | False | S52624S |                                                                                                                       |                                                                                                                       | nan                                                                                      | False |
| 89 | T24531D | Corrosion of first degree of right lower leg, subsequent encounter                                                                                      | T24621D | Corrosion of second degree of right knee, subsequent encounter                                                    | Corrosion of second degree of right knee, subsequent encounter                                                    | Corrosion of right leg, subsequent encounter                                             | False | T24212S | Burn of second degree of left thigh, sequela                                                                          | Burn of second degree of left thigh, sequela                                                                          | Leg tissue injury                                                                        | False |
| 90 | V162XXA | Unspecified pedal cyclist injured in collision with other nonmotor vehicle in nontraffic accident, initial encounter                                    | V100XXA | Pedal cycle driver injured in collision with pedestrian or animal in nontraffic accident, initial encounter       | Pedal cycle driver injured in collision with pedestrian or animal in nontraffic accident, initial encounter       | Unspecified pedal cyclist injured in collision in nontraffic accident, initial encounter | False | V179XXA | Unspecified pedal cyclist injured in collision with fixed or stationary object in traffic accident, initial encounter | Unspecified pedal cyclist injured in collision with fixed or stationary object in traffic accident, initial encounter | Unspecified pedal cyclist injured in collision in nontraffic accident, initial encounter | False |
| 91 | C441091 | Unspecified malignant neoplasm of skin of left upper eyelid, including canthus                                                                          | C44192  | Other specified malignant neoplasm of skin of right eyelid, including canthus                                     |                                                                                                                   | nan                                                                                      | False | C44129  | Squamous cell carcinoma of skin of left eyelid, including canthus                                                     |                                                                                                                       | nan                                                                                      | True  |
| 92 | T8201XD | Breakdown (mechanical) of heart valve prosthesis, subsequent encounter                                                                                  | T8201XD | Breakdown (mechanical) of heart valve prosthesis, subsequent encounter                                            | Breakdown (mechanical) of heart valve prosthesis, subsequent encounter                                            | Exact Match                                                                              | True  | T82795D |                                                                                                                       |                                                                                                                       | nan                                                                                      | False |
| 93 | V9323XA | Heat exposure on board other powered watercraft, initial encounter                                                                                      | X52XXA  | Prolonged stay in weightless environment, initial encounter                                                       | Prolonged stay in weightless environment, initial encounter                                                       | nan                                                                                      | False | 9104XA  |                                                                                                                       |                                                                                                                       | nan                                                                                      | False |
| 94 | S0240CG | Maxillary fracture, right side, subsequent encounter for fracture with delayed healing                                                                  | S0261XD |                                                                                                                   |                                                                                                                   | nan                                                                                      | False | S0261XD |                                                                                                                       |                                                                                                                       | nan                                                                                      | False |
| 95 | M7670   | Peroneal tendinitis, unspecified leg                                                                                                                    | M7660   | Achilles tendinitis, unspecified leg                                                                              | Achilles tendinitis, unspecified leg                                                                              | Ankle tendinitis                                                                         | True  | M7667   |                                                                                                                       |                                                                                                                       | nan                                                                                      | False |
| 96 | T2173XD | Corrosion of third degree of upper back, subsequent encounter                                                                                           | T2131XD | Burn of third degree of chest wall, subsequent encounter                                                          | Burn of third degree of chest wall, subsequent encounter                                                          | Third tissue injury of upper torso, subsequent encounter                                 | False | T23328D |                                                                                                                       |                                                                                                                       | nan                                                                                      | False |
| 97 | V521XXS | Passenger in pick-up truck or van injured in collision with two- or three-wheeled motor vehicle in nontraffic accident, sequela                         | V87729S |                                                                                                                   |                                                                                                                   | nan                                                                                      | False | V2842XS |                                                                                                                       |                                                                                                                       | nan                                                                                      | False |
| 98 | S82454G | Nondisplaced comminuted fracture of shaft of right fibula, subsequent encounter for closed fracture with delayed healing                                | S82441D | Displaced spiral fracture of shaft of right fibula, subsequent encounter for closed fracture with routine healing | Displaced spiral fracture of shaft of right fibula, subsequent encounter for closed fracture with routine healing | Fracture of shaft of right fibula, subsequent encounter for closed fracture              | False | S82445K | Nondisplaced spiral fracture of shaft of left fibula, subsequent encounter for closed fracture with nonunion          | Nondisplaced spiral fracture of shaft of left fibula, subsequent encounter for closed fracture with nonunion          | Fracture of shaft of fibula, subsequent encounter for closed fracture                    | False |

|     |         |                                                                                                                                         |         |                                                                                                   |                                                                                                   |                                                                                                |       |         |  |  |     |       |
|-----|---------|-----------------------------------------------------------------------------------------------------------------------------------------|---------|---------------------------------------------------------------------------------------------------|---------------------------------------------------------------------------------------------------|------------------------------------------------------------------------------------------------|-------|---------|--|--|-----|-------|
| 99  | T2060XD | Corrosion of second degree of head, face, and neck, unspecified site, subsequent encounter                                              | T2020XD | Burn of second degree of head, face, and neck, unspecified site, subsequent encounter             | Burn of second degree of head, face, and neck, unspecified site, subsequent encounter             | Tissue injury of second degree of head, face, and neck, unspecified site, subsequent encounter | True  | T2221XD |  |  | nan | False |
| 100 | S52252R | Displaced comminuted fracture of shaft of ulna, left arm, subsequent encounter for open fracture type IIIA, IIIB, or IIIC with malunion | S52312K | Greenstick fracture of shaft of radius, left arm, subsequent encounter for fracture with nonunion | Greenstick fracture of shaft of radius, left arm, subsequent encounter for fracture with nonunion | Fracture of left arm, subsequent encounter                                                     | False | S52205K |  |  | nan | False |

Supplementary Table 3: Code-level generated outputs and similarity for ICD-10-PCS

| Case | Original ICD-10-PCS code | Original ICD-10-PCS code description                                                                       | GPT-4 Code | Description matching GPT-4 code                                                    | Description matching billable GPT-4 code                                           | GPT-4 code semantic similarity                                           | GPT-4 code syntactic similarity | GPT-3.5 Code | Description matching GPT-3.5 code                                                 | Description matching billable GPT-3.5 code                                        | GPT-3.5 code semantic similarity                                        | GPT-3.5 code syntactic similarity |
|------|--------------------------|------------------------------------------------------------------------------------------------------------|------------|------------------------------------------------------------------------------------|------------------------------------------------------------------------------------|--------------------------------------------------------------------------|---------------------------------|--------------|-----------------------------------------------------------------------------------|-----------------------------------------------------------------------------------|-------------------------------------------------------------------------|-----------------------------------|
| 1    | 0DW0XDZ                  | Revision of Intraluminal Device in Upper Intestinal Tract, External Approach                               | 0DJ8Z      | Inspection of Lower Intestinal Tract, Via Natural or Artificial Opening Endoscopic | Inspection of Lower Intestinal Tract, Via Natural or Artificial Opening Endoscopic | nan                                                                      | False                           | 0DQGXNZ      |                                                                                   |                                                                                   | nan                                                                     | False                             |
| 2    | 04HU0DZ                  | Insertion of Intraluminal Device into Left Peroneal Artery, Open Approach                                  | 04LJ0DZ    | Occlusion of Left External Iliac Artery with Intraluminal Device, Open Approach    | Occlusion of Left External Iliac Artery with Intraluminal Device, Open Approach    | Use of an intraluminal device in a lower leg artery, open approach       | False                           | 037F04Z      | Dilation of Left Hand Artery with Drug-eluting Intraluminal Device, Open Approach | Dilation of Left Hand Artery with Drug-eluting Intraluminal Device, Open Approach | Use of an intraluminal device in an artery, open approach               | False                             |
| 3    | 041D0A7                  | Bypass Left Common Iliac Artery to Left Common Iliac Artery with Autologous Arterial Tissue, Open Approach | 04C10Z3    |                                                                                    |                                                                                    | nan                                                                      | False                           | 06H033Z      | Insertion of Infusion Device into Inferior Vena Cava, Percutaneous Approach       | Insertion of Infusion Device into Inferior Vena Cava, Percutaneous Approach       | nan                                                                     | False                             |
| 4    | 0TUD8Z                   | Supplement Urethra with Autologous Tissue Substitute, Via Natural or Artificial Opening Endoscopic         | 0VQR8MZ    |                                                                                    |                                                                                    | nan                                                                      | False                           | 0UDG3ZZ      |                                                                                   |                                                                                   | nan                                                                     | False                             |
| 5    | 0SGK0KZ                  | Fusion of Right Tarsometatarsal Joint with Nonautologous Tissue Substitute, Open Approach                  | 0SGG0KZ    | Fusion of Left Ankle Joint with Nonautologous Tissue Substitute, Open Approach     | Fusion of Left Ankle Joint with Nonautologous Tissue Substitute, Open Approach     | Fusion of foot joint with nonautologous tissue substitute, open approach | True                            | 0SG60JZ      | Fusion of Coccygeal Joint with Synthetic Substitute, Open Approach                | Fusion of Coccygeal Joint with Synthetic Substitute, Open Approach                | Fusion of joint with tissue substitute, open approach                   | False                             |
| 6    | 0FU84JZ                  | Supplement Cystic Duct with Synthetic Substitute, Percutaneous Endoscopic Approach                         | 0F9R4JZ    |                                                                                    |                                                                                    | nan                                                                      | False                           | 0CJ40ZZ      |                                                                                   |                                                                                   | nan                                                                     | False                             |
| 7    | 01CK0ZZ                  | Extirpation of Matter from Head and Neck Sympathetic Nerve, Open Approach                                  | 00B00ZZ    | Excision of Brain, Open Approach                                                   | Excision of Brain, Open Approach                                                   | Removal of nervous system tissue in head, open approach                  | False                           | 0BH507Z      |                                                                                   |                                                                                   | nan                                                                     | False                             |
| 8    | 0SPL05Z                  | Removal of External Fixation Device from Left Tarsometatarsal Joint, Open Approach                         | 0SPJ0ZZ    |                                                                                    |                                                                                    | nan                                                                      | False                           | 0QS704Z      | Reposition Left Upper Femur with Internal Fixation Device, Open Approach          | Reposition Left Upper Femur with Internal Fixation Device, Open Approach          | Related to use of an internal fixation device in the leg, open approach | False                             |
| 9    | 0YUA0JZ                  | Supplement Bilateral Inguinal Region with Synthetic Substitute, Open Approach                              | 0H9N0JZ    |                                                                                    |                                                                                    | nan                                                                      | False                           | 0JQS04Z      |                                                                                   |                                                                                   | nan                                                                     | False                             |
| 10   | 0U9C8ZZ                  | Drainage of Cervix, Via Natural or Artificial Opening Endoscopic                                           | 0U9D8ZZ    |                                                                                    |                                                                                    | nan                                                                      | True                            | 0UJG8ZZ      |                                                                                   |                                                                                   | nan                                                                     | False                             |
| 11   | 0BC63ZZ                  | Extirpation of Matter from Right Lower Lobe Bronchus, Percutaneous Approach                                | 0B9M3ZZ    | Drainage of Bilateral Lungs, Percutaneous Approach                                 | Drainage of Bilateral Lungs, Percutaneous Approach                                 | Removal of material from lungs, percutaneous approach                    | False                           | 0WUJXZZ      |                                                                                   |                                                                                   | nan                                                                     | False                             |
| 12   | CP2G1ZZ                  | Tomographic (Tomo) Nuclear Medicine Imaging of Thoracic Spine using Technetium 99m (Tc-99m)                | BW24ZZZ    | Computerized Tomography (CT Scan) of Chest and Abdomen                             | Computerized Tomography (CT Scan) of Chest and Abdomen                             | Chest imaging                                                            | False                           | 04NJ3ZZ      | Release Left External Iliac Artery, Percutaneous Approach                         | Release Left External Iliac Artery, Percutaneous Approach                         | nan                                                                     | False                             |
| 13   | 0N8J3ZZ                  | Division of Left Lacrimal Bone, Percutaneous Approach                                                      | 02PU3ZZ    |                                                                                    |                                                                                    | nan                                                                      | False                           | 0SG107Z      |                                                                                   |                                                                                   | nan                                                                     | False                             |
| 14   | 0F9630Z                  | Drainage of Left Hepatic Duct with Drainage Device, Percutaneous Approach                                  | 0F993DZ    |                                                                                    |                                                                                    | nan                                                                      | False                           | 0D5G7DZ      |                                                                                   |                                                                                   | nan                                                                     | False                             |
| 15   | 09B14ZX                  | Excision of Left External Ear, Percutaneous Endoscopic Approach, Diagnostic                                | 0CBP4ZX    |                                                                                    |                                                                                    | nan                                                                      | False                           | 0HBV4ZZ      |                                                                                   |                                                                                   | nan                                                                     | False                             |
| 16   | 0RJTXZZ                  | Inspection of Left Carpometacarpal Joint, External Approach                                                | 0SQ50ZZ    | Repair Sacrococcygeal Joint, Open Approach                                         | Repair Sacrococcygeal Joint, Open Approach                                         | nan                                                                      | False                           | 0JVS8ZZ      |                                                                                   |                                                                                   | nan                                                                     | False                             |
| 17   | 047Q0Z1                  | Dilation of Left Anterior Tibial Artery using Drug-Coated Balloon, Open Approach                           | 04V30DZ    | Restriction of Hepatic Artery with Intraluminal Device, Open Approach              | Restriction of Hepatic Artery with Intraluminal Device, Open Approach              | nan                                                                      | False                           | 02762ZZ      |                                                                                   |                                                                                   | nan                                                                     | False                             |

|    |         |                                                                                                                                                |         |                                                                                            |                                                                                            |                                                                            |       |         |                                                                              |                                                                              |                                                        |       |
|----|---------|------------------------------------------------------------------------------------------------------------------------------------------------|---------|--------------------------------------------------------------------------------------------|--------------------------------------------------------------------------------------------|----------------------------------------------------------------------------|-------|---------|------------------------------------------------------------------------------|------------------------------------------------------------------------------|--------------------------------------------------------|-------|
| 18 | 0HRX3JZ | Replacement of Left Nipple with Synthetic Substitute, Percutaneous Approach                                                                    | 0HRPXJZ |                                                                                            |                                                                                            | nan                                                                        | False | 0WJF3ZZ | Inspection of Abdominal Wall, Percutaneous Approach                          | Inspection of Abdominal Wall, Percutaneous Approach                          | nan                                                    | False |
| 19 | 0D1B0JB | Bypass Ileum to Ileum with Synthetic Substitute, Open Approach                                                                                 | 0DBP0JZ |                                                                                            |                                                                                            | nan                                                                        | False | 06UK3ZZ |                                                                              |                                                                              | nan                                                    | False |
| 20 | 019L3ZZ | Drainage of Thoracic Sympathetic Nerve, Percutaneous Approach                                                                                  | 00P03ZZ |                                                                                            |                                                                                            | nan                                                                        | False | 0BCK4ZZ | Extirpation of Matter from Right Lung, Percutaneous Endoscopic Approach      | Extirpation of Matter from Right Lung, Percutaneous Endoscopic Approach      | Removal of material from thorax, percutaneous approach | False |
| 21 | B31P1ZZ | Fluoroscopy of Thoraco-Abdominal Aorta using Low Osmolar Contrast                                                                              | BW28ZZZ | Computerized Tomography (CT Scan) of Head                                                  | Computerized Tomography (CT Scan) of Head                                                  | Both are imaging techniques                                                | False | 0RFV0JZ |                                                                              |                                                                              | nan                                                    | False |
| 22 | 04NF3ZZ | Release Left Internal Iliac Artery, Percutaneous Approach                                                                                      | 04U03ZZ |                                                                                            |                                                                                            | nan                                                                        | False | 0RBC0ZZ | Excision of Right Temporomandibular Joint, Open Approach                     | Excision of Right Temporomandibular Joint, Open Approach                     | nan                                                    | False |
| 23 | 07924ZZ | Drainage of Left Neck Lymphatic, Percutaneous Endoscopic Approach                                                                              | 0W9P4ZZ |                                                                                            |                                                                                            | nan                                                                        | False | 0DPG3ZZ |                                                                              |                                                                              | nan                                                    | False |
| 24 | 0RG83KJ | Fusion of 8 or more Thoracic Vertebral Joints with Nonautologous Tissue Substitute, Posterior Approach, Anterior Column, Percutaneous Approach | 0RGX0KZ | Fusion of Left Finger Phalangeal Joint with Nonautologous Tissue Substitute, Open Approach | Fusion of Left Finger Phalangeal Joint with Nonautologous Tissue Substitute, Open Approach | Fusion of joint with nonautologous tissue substitute                       | False | 0Q9C0TZ |                                                                              |                                                                              | nan                                                    | False |
| 25 | 3E09XKZ | Introduction of Other Diagnostic Substance into Nose, External Approach                                                                        | 3E0LX3Z |                                                                                            |                                                                                            | nan                                                                        | False | 0WQNXZZ | Repair Female Perineum, External Approach                                    | Repair Female Perineum, External Approach                                    | nan                                                    | False |
| 26 | 0YJ94ZZ | Inspection of Right Lower Extremity, Percutaneous Endoscopic Approach                                                                          | 0W9H4ZZ | Drainage of Retroperitoneum, Percutaneous Endoscopic Approach                              | Drainage of Retroperitoneum, Percutaneous Endoscopic Approach                              | nan                                                                        | False | 0JVG8ZZ |                                                                              |                                                                              | nan                                                    | False |
| 27 | 0UQ14ZZ | Repair Left Ovary, Percutaneous Endoscopic Approach                                                                                            | 0UT94ZZ | Resection of Uterus, Percutaneous Endoscopic Approach                                      | Resection of Uterus, Percutaneous Endoscopic Approach                                      | Female reproductive organ surgery, percutaneous endoscopic approach        | False | 0U5H38Z |                                                                              |                                                                              | nan                                                    | False |
| 28 | DD17B8Z | Low Dose Rate (LDR) Brachytherapy of Rectum using Iridium 192 (Ir-192)                                                                         | D1HW0ZZ |                                                                                            |                                                                                            | nan                                                                        | False | 0KQG0ZZ |                                                                              |                                                                              | nan                                                    | False |
| 29 | 047L4Z1 | Dilation of Left Femoral Artery using Drug-Coated Balloon, Percutaneous Endoscopic Approach                                                    | 04V34DZ | Restriction of Hepatic Artery with Intraluminal Device, Percutaneous Endoscopic Approach   | Restriction of Hepatic Artery with Intraluminal Device, Percutaneous Endoscopic Approach   | nan                                                                        | False | 027N3ZZ |                                                                              |                                                                              | Left Femoral Artery                                    | False |
| 30 | 02710GZ | Dilation of Coronary Artery, Two Arteries with Four or More Intraluminal Devices, Open Approach                                                | 02703DZ | Dilation of Coronary Artery, One Artery with Intraluminal Device, Percutaneous Approach    | Dilation of Coronary Artery, One Artery with Intraluminal Device, Percutaneous Approach    | Dilation of coronary artery with intraluminal device                       | False | 021B04Z |                                                                              |                                                                              | nan                                                    | False |
| 31 | 00XM4ZS | Transfer Facial Nerve to Hypoglossal Nerve, Percutaneous Endoscopic Approach                                                                   | 00CN4ZZ | Extirpation of Matter from Acoustic Nerve, Percutaneous Endoscopic Approach                | Extirpation of Matter from Acoustic Nerve, Percutaneous Endoscopic Approach                | Cranial nerve surgery, percutaneous endoscopic approach                    | False | 0J1D8NZ |                                                                              |                                                                              | nan                                                    | False |
| 32 | 0QUR0JZ | Supplement Left Toe Phalanx with Synthetic Substitute, Open Approach                                                                           | 0SP60JZ | Removal of Synthetic Substitute from Coccygeal Joint, Open Approach                        | Removal of Synthetic Substitute from Coccygeal Joint, Open Approach                        | Related to synthetic substitute, open approach                             | False | 0SP504Z | Removal of Internal Fixation Device from Sacrococcygeal Joint, Open Approach | Removal of Internal Fixation Device from Sacrococcygeal Joint, Open Approach | nan                                                    | False |
| 33 | 04VC3EZ | Restriction of Right Common Iliac Artery with Branched or Fenestrated Intraluminal Device, One or Two Arteries, Percutaneous Approach          | 047K3DZ | Dilation of Right Femoral Artery with Intraluminal Device, Percutaneous Approach           | Dilation of Right Femoral Artery with Intraluminal Device, Percutaneous Approach           | Use of an intraluminal device in a upper leg artery, percutaneous approach | False | 0RB408Z |                                                                              |                                                                              | nan                                                    | False |
| 34 | 04UJ4JZ | Supplement Left External Iliac Artery with Synthetic Substitute, Percutaneous Endoscopic Approach                                              | 04WQ4JZ |                                                                                            |                                                                                            | nan                                                                        | False | 0VJ707Z |                                                                              |                                                                              | nan                                                    | False |
| 35 | D91D99Z | High Dose Rate (HDR) Brachytherapy of Nasopharynx using Iodine 125 (I-125)                                                                     | D1H30ZZ |                                                                                            |                                                                                            | nan                                                                        | False | 0Q4D0ZZ |                                                                              |                                                                              | nan                                                    | False |

|    |         |                                                                                                                   |         |                                                                                                      |                                                                                                      |                                                                                |       |         |                                                                  |                                                                  |                       |       |
|----|---------|-------------------------------------------------------------------------------------------------------------------|---------|------------------------------------------------------------------------------------------------------|------------------------------------------------------------------------------------------------------|--------------------------------------------------------------------------------|-------|---------|------------------------------------------------------------------|------------------------------------------------------------------|-----------------------|-------|
| 36 | 0PS93ZZ | Reposition Right Clavicle, Percutaneous Approach                                                                  | 0PS03ZZ | Reposition Sternum, Percutaneous Approach                                                            | Reposition Sternum, Percutaneous Approach                                                            | Reposition upper torso bone, percutaneous approach                             | True  | 0R3R0NZ |                                                                  |                                                                  | nan                   | False |
| 37 | 00XK0ZN | Transfer Trigeminal Nerve to Acoustic Nerve, Open Approach                                                        | 00C10ZZ | Extirpation of Matter from Cerebral Meninges, Open Approach                                          | Extirpation of Matter from Cerebral Meninges, Open Approach                                          | Central nervous system surgery, open approach                                  | False | 0XQD0ZZ | Repair Right Lower Arm, Open Approach                            | Repair Right Lower Arm, Open Approach                            | nan                   | False |
| 38 | HZ87ZZZ | Medication Management for Substance Abuse Treatment, Bupropion                                                    | HZ2C4ZZ |                                                                                                      |                                                                                                      | nan                                                                            | False | 3E0D30Z |                                                                  |                                                                  | nan                   | False |
| 39 | 0MBG4ZX | Excision of Rib(s) Bursa and Ligament, Percutaneous Endoscopic Approach, Diagnostic                               | 0WBQ4ZX |                                                                                                      |                                                                                                      | nan                                                                            | False | 0R1R04Z |                                                                  |                                                                  | nan                   | False |
| 40 | 02H00YZ | Insertion of Other Device into Coronary Artery, One Artery, Open Approach                                         | 02700ZZ | Dilation of Coronary Artery, One Artery, Open Approach                                               | Dilation of Coronary Artery, One Artery, Open Approach                                               | Coronary artery                                                                | False | 021R0ZZ |                                                                  |                                                                  | Coronary Artery       | False |
| 41 | 0BWOXZZ | Revision of Monitoring Device in Tracheobronchial Tree, External Approach                                         | 0BJD8ZZ |                                                                                                      |                                                                                                      | nan                                                                            | False | 0BH98ZZ |                                                                  |                                                                  | nan                   | False |
| 42 | 039C0ZZ | Drainage of Left Radial Artery, Open Approach                                                                     | 03CJ0ZZ | Extirpation of Matter from Left Common Carotid Artery, Open Approach                                 | Extirpation of Matter from Left Common Carotid Artery, Open Approach                                 | Removal of material from left-sided arteries, open approach                    | False | 0J8H38Z |                                                                  |                                                                  | nan                   | False |
| 43 | F0701UZ | Muscle Performance Treatment of Neurological System - Head and Neck using Prosthesis                              | HZ8C5ZZ |                                                                                                      |                                                                                                      | nan                                                                            | False | 5A135LN |                                                                  |                                                                  | nan                   | False |
| 44 | 30243W0 | Transfusion of Autologous Factor IX into Central Vein, Percutaneous Approach                                      | 30233Y0 | Transfusion of Autologous Hematopoietic Stem Cells into Peripheral Vein, Percutaneous Approach       | Transfusion of Autologous Hematopoietic Stem Cells into Peripheral Vein, Percutaneous Approach       | Transfusion of autologous substances into venous system, percutaneous approach | False | 3E043WZ |                                                                  |                                                                  | nan                   | False |
| 45 | 0VW407Z | Revision of Autologous Tissue Substitute in Prostate and Seminal Vesicles, Open Approach                          | 0VQW0ZZ |                                                                                                      |                                                                                                      | nan                                                                            | False | 0S2H8ZZ |                                                                  |                                                                  | nan                   | False |
| 46 | 057B3DZ | Dilation of Right Basilic Vein with Intraluminal Device, Percutaneous Approach                                    | 05V23DZ |                                                                                                      |                                                                                                      | nan                                                                            | False | 037U0ZZ | Dilation of Right Thyroid Artery, Open Approach                  | Dilation of Right Thyroid Artery, Open Approach                  | Dilation of vessel    | False |
| 47 | 0NT70ZZ | Resection of Occipital Bone, Open Approach                                                                        | 01BN0ZZ | Excision of Lumbar Sympathetic Nerve, Open Approach                                                  | Excision of Lumbar Sympathetic Nerve, Open Approach                                                  | nan                                                                            | False | 0HBU07Z |                                                                  |                                                                  | nan                   | False |
| 48 | 0LRD4KZ | Replacement of Left Thorax Tendon with Nonautologous Tissue Substitute, Percutaneous Endoscopic Approach          | 0KQQ4KZ |                                                                                                      |                                                                                                      | nan                                                                            | False | 0QH104Z | Insertion of Internal Fixation Device into Sacrum, Open Approach | Insertion of Internal Fixation Device into Sacrum, Open Approach | nan                   | False |
| 49 | 0VUG8KZ | Supplement Left Spermatic Cord with Nonautologous Tissue Substitute, Via Natural or Artificial Opening Endoscopic | 0VBQ8KZ |                                                                                                      |                                                                                                      | nan                                                                            | False | 0VJF7ZZ |                                                                  |                                                                  | nan                   | False |
| 50 | 0TWB4YZ | Revision of Other Device in Bladder, Percutaneous Endoscopic Approach                                             | 0TTD4ZZ | Resection of Urethra, Percutaneous Endoscopic Approach                                               | Resection of Urethra, Percutaneous Endoscopic Approach                                               | Urinary tract surgery, percutaneous endoscopic approach                        | False | 0PBG04Z |                                                                  |                                                                  | nan                   | False |
| 51 | CW13YZZ | Planar Nuclear Medicine Imaging of Chest using Other Radionuclide                                                 | C0210ZZ |                                                                                                      |                                                                                                      | nan                                                                            | False | B32Z1ZZ |                                                                  |                                                                  | nan                   | False |
| 52 | 037A4EZ | Dilation of Left Ulnar Artery with Two Intraluminal Devices, Percutaneous Endoscopic Approach                     | 027034Z | Dilation of Coronary Artery, One Artery with Drug-eluting Intraluminal Device, Percutaneous Approach | Dilation of Coronary Artery, One Artery with Drug-eluting Intraluminal Device, Percutaneous Approach | Dilation of artery with intraluminal device                                    | False | 02703JZ |                                                                  |                                                                  | nan                   | False |
| 53 | 0TNC7ZZ | Release Bladder Neck, Via Natural or Artificial Opening                                                           | 0T9V7ZZ |                                                                                                      |                                                                                                      | nan                                                                            | False | 0V5L0ZZ | Destruction of Bilateral Epididymis, Open Approach               | Destruction of Bilateral Epididymis, Open Approach               | Genitourinary surgery | False |
| 54 | 0THC0LZ | Insertion of Artificial Sphincter into Bladder Neck, Open Approach                                                | 0TH10HZ |                                                                                                      |                                                                                                      | nan                                                                            | False | 0W8J0ZZ |                                                                  |                                                                  | nan                   | False |

|    |         |                                                                                                              |         |                                                                                  |                                                                                  |                                               |       |         |                                                                           |                                                                           |                                                         |       |
|----|---------|--------------------------------------------------------------------------------------------------------------|---------|----------------------------------------------------------------------------------|----------------------------------------------------------------------------------|-----------------------------------------------|-------|---------|---------------------------------------------------------------------------|---------------------------------------------------------------------------|---------------------------------------------------------|-------|
| 55 | 0V934ZZ | Drainage of Bilateral Seminal Vesicles, Percutaneous Endoscopic Approach                                     | 0T9B8ZZ | Drainage of Bladder, Via Natural or Artificial Opening Endoscopic                | Drainage of Bladder, Via Natural or Artificial Opening Endoscopic                | Drainage of genitourinary structures          | False | 0TH7ZZ  |                                                                           |                                                                           | nan                                                     | False |
| 56 | 0JHD0NZ | Insertion of Tissue Expander into Right Upper Arm Subcutaneous Tissue and Fascia, Open Approach              | 0HRBXJZ | Replacement of Right Upper Arm Skin with Synthetic Substitute, External Approach | Replacement of Right Upper Arm Skin with Synthetic Substitute, External Approach | Manipulation of right upper arm tissue        | False | 0DQ67ZZ | Repair Stomach, Via Natural or Artificial Opening                         | Repair Stomach, Via Natural or Artificial Opening                         | nan                                                     | False |
| 57 | 0DC58ZZ | Extirpation of Matter from Esophagus, Via Natural or Artificial Opening Endoscopic                           | 0DB88ZZ | Excision of Small Intestine, Via Natural or Artificial Opening Endoscopic        | Excision of Small Intestine, Via Natural or Artificial Opening Endoscopic        | Upper gastrointestinal endoscopic procedures  | False | 0DJ98ZZ |                                                                           |                                                                           | nan                                                     | False |
| 58 | 0W9240Z | Drainage of Face with Drainage Device, Percutaneous Endoscopic Approach                                      | 0H9A8KZ |                                                                                  |                                                                                  | nan                                           | False | 0S9J7ZZ |                                                                           |                                                                           | nan                                                     | False |
| 59 | 051947Y | Bypass Right Brachial Vein to Upper Vein with Autologous Tissue Substitute, Percutaneous Endoscopic Approach | 051V3DZ |                                                                                  |                                                                                  | nan                                           | False | 06T80ZZ |                                                                           |                                                                           | nan                                                     | False |
| 60 | 0YQTXZZ | Repair Right 3rd Toe, External Approach                                                                      | 0SPC0ZZ |                                                                                  |                                                                                  | nan                                           | False | 0YQS0ZZ | Repair Left 2nd Toe, Open Approach                                        | Repair Left 2nd Toe, Open Approach                                        | Toe repair, open approach                               | False |
| 61 | B320ZZZ | Computerized Tomography (CT Scan) of Thoracic Aorta using Intravascular Optical Coherence                    | BP32ZZZ |                                                                                  |                                                                                  | nan                                           | False | B231ZZZ | Magnetic Resonance Imaging (MRI) of Multiple Coronary Arteries            | Magnetic Resonance Imaging (MRI) of Multiple Coronary Arteries            | Imaging of chest arteries                               | False |
| 62 | 0QHB38Z | Insertion of Limb Lengthening External Fixation Device into Right Lower Femur, Percutaneous Approach         | 0QS604Z | Reposition Right Upper Femur with Internal Fixation Device, Open Approach        | Reposition Right Upper Femur with Internal Fixation Device, Open Approach        | Right femur surgery involving fixation device | False | 0QWB8ZZ |                                                                           |                                                                           | nan                                                     | False |
| 63 | 07544ZZ | Destruction of Left Upper Extremity Lymphatic, Percutaneous Endoscopic Approach                              | 07L83ZZ | Occlusion of Right Internal Mammary Lymphatic, Percutaneous Approach             | Occlusion of Right Internal Mammary Lymphatic, Percutaneous Approach             | Obstruction of upper lymphatic structures     | False | 04T12JZ |                                                                           |                                                                           | nan                                                     | False |
| 64 | 04VT4ZZ | Restriction of Right Peroneal Artery, Percutaneous Endoscopic Approach                                       | 04L23DZ | Occlusion of Gastric Artery with Intraluminal Device, Percutaneous Approach      | Occlusion of Gastric Artery with Intraluminal Device, Percutaneous Approach      | Blocking arteries                             | False | 02720NZ |                                                                           |                                                                           | nan                                                     | False |
| 65 | 0RGP07Z | Fusion of Left Wrist Joint with Autologous Tissue Substitute, Open Approach                                  | 0RG10KZ |                                                                                  |                                                                                  | nan                                           | False | 0RQF0JZ |                                                                           |                                                                           | nan                                                     | False |
| 66 | 08NE3ZZ | Release Right Retina, Percutaneous Approach                                                                  | 08P04ZZ |                                                                                  |                                                                                  | nan                                           | False | 0LQ50ZZ | Repair Right Lower Arm and Wrist Tendon, Open Approach                    | Repair Right Lower Arm and Wrist Tendon, Open Approach                    | nan                                                     | False |
| 67 | 0KXK0Z1 | Transfer Right Abdomen Muscle with Subcutaneous Tissue, Open Approach                                        | 0HRG0ZZ |                                                                                  |                                                                                  | nan                                           | False | 0KQG0ZZ | Repair Left Trunk Muscle, Open Approach                                   | Repair Left Trunk Muscle, Open Approach                                   | Manipulation of abdominal muscles, open approach        | False |
| 68 | 0QNJ0ZZ | Release Right Fibula, Open Approach                                                                          | 0PQ70ZZ | Repair Right Glenoid Cavity, Open Approach                                       | Repair Right Glenoid Cavity, Open Approach                                       | nan                                           | False | 0QS605Z | Reposition Right Upper Femur with External Fixation Device, Open Approach | Reposition Right Upper Femur with External Fixation Device, Open Approach | Right leg skeletal repair                               | False |
| 69 | 04WYX3Z | Revision of Infusion Device in Lower Artery, External Approach                                               | 02W30ZZ |                                                                                  |                                                                                  | nan                                           | False | 031D4ZZ |                                                                           |                                                                           | nan                                                     | False |
| 70 | 0BV60CZ | Restriction of Right Lower Lobe Bronchus with Extraluminal Device, Open Approach                             | 0B513DZ |                                                                                  |                                                                                  | nan                                           | False | 0QBB3ZZ | Excision of Right Lower Femur, Percutaneous Approach                      | Excision of Right Lower Femur, Percutaneous Approach                      | nan                                                     | False |
| 71 | 0WP90JZ | Removal of Synthetic Substitute from Right Pleural Cavity, Open Approach                                     | 0B9H0KZ |                                                                                  |                                                                                  | nan                                           | False | 0TJ50ZZ | Inspection of Kidney, Open Approach                                       | Inspection of Kidney, Open Approach                                       | nan                                                     | False |
| 72 | 0JB50ZZ | Excision of Left Neck Subcutaneous Tissue and Fascia, Open Approach                                          | 0HB60ZZ |                                                                                  |                                                                                  | nan                                           | False | 0JQ70ZZ | Repair Back Subcutaneous Tissue and Fascia, Open Approach                 | Repair Back Subcutaneous Tissue and Fascia, Open Approach                 | Involving subcutaneous tissue and fascia, Open Approach | False |



|    |         |                                                                                                                        |         |                                                                                       |                                                                                       |                                                     |     |       |         |                                                                       |                                                                       |                            |       |
|----|---------|------------------------------------------------------------------------------------------------------------------------|---------|---------------------------------------------------------------------------------------|---------------------------------------------------------------------------------------|-----------------------------------------------------|-----|-------|---------|-----------------------------------------------------------------------|-----------------------------------------------------------------------|----------------------------|-------|
| 73 | 0D1M4JP | Bypass Descending Colon to Rectum with Synthetic Substitute, Percutaneous Endoscopic Approach                          | 0D1C3DZ |                                                                                       |                                                                                       |                                                     | nan | False | 06P84ZZ |                                                                       |                                                                       | nan                        | False |
| 74 | 0D1B8ZP | Bypass Ileum to Rectum, Via Natural or Artificial Opening Endoscopic                                                   | 0D1B8DZ |                                                                                       |                                                                                       |                                                     | nan | False | 0DVG4ZZ | Restriction of Left Large Intestine, Percutaneous Endoscopic Approach | Restriction of Left Large Intestine, Percutaneous Endoscopic Approach | nan                        | False |
| 75 | HZ48ZZZ | Group Counseling for Substance Abuse Treatment, Confrontational                                                        | HZ2ZZZZ | Detoxification Services for Substance Abuse Treatment                                 | Detoxification Services for Substance Abuse Treatment                                 |                                                     | nan | False | 9A645GZ |                                                                       |                                                                       | nan                        | False |
| 76 | 0BV94ZZ | Restriction of Lingula Bronchus, Percutaneous Endoscopic Approach                                                      | 0B513ZZ | Destruction of Trachea, Percutaneous Approach                                         | Destruction of Trachea, Percutaneous Approach                                         | Obstructing portions of the respiratory tract       |     | False | 0BQ37NZ |                                                                       |                                                                       | nan                        | False |
| 77 | 0D120ZB | Bypass Middle Esophagus to Ileum, Open Approach                                                                        | 0D1M0DZ |                                                                                       |                                                                                       |                                                     | nan | False | 0DTG4ZZ | Resection of Left Large Intestine, Percutaneous Endoscopic Approach   | Resection of Left Large Intestine, Percutaneous Endoscopic Approach   | nan                        | False |
| 78 | 0D7A8DZ | Dilation of Jejunum with Intraluminal Device, Via Natural or Artificial Opening Endoscopic                             | 0D548ZZ | Destruction of Esophagogastric Junction, Via Natural or Artificial Opening Endoscopic | Destruction of Esophagogastric Junction, Via Natural or Artificial Opening Endoscopic | Endoscopic procedures in the gastrointestinal tract |     | False | 0WQH4ZZ |                                                                       |                                                                       | nan                        | False |
| 79 | 0HWI7KZ | Revision of Nonautologous Tissue Substitute in Right Breast, Via Natural or Artificial Opening                         | 0HQ78KZ |                                                                                       |                                                                                       |                                                     | nan | False | 0HBT0ZX | Excision of Right Breast, Open Approach, Diagnostic                   | Excision of Right Breast, Open Approach, Diagnostic                   | Involving right breast     | False |
| 80 | 07PK43Z | Removal of Infusion Device from Thoracic Duct, Percutaneous Endoscopic Approach                                        | 06S73DZ |                                                                                       |                                                                                       |                                                     | nan | False | 06T20ZZ |                                                                       |                                                                       | nan                        | False |
| 81 | 03703ZZ | Dilation of Right Internal Mammary Artery, Percutaneous Approach                                                       | 02720ZZ | Dilation of Coronary Artery, Three Arteries, Open Approach                            | Dilation of Coronary Artery, Three Arteries, Open Approach                            | Dilation of chest artery                            |     | False | 02RG0ZZ |                                                                       |                                                                       | nan                        | False |
| 82 | 03VM4HZ | Restriction of Right External Carotid Artery with Intraluminal Device, Flow Diverter, Percutaneous Endoscopic Approach | 031C3DZ |                                                                                       |                                                                                       |                                                     | nan | False | 02721CZ |                                                                       |                                                                       | nan                        | False |
| 83 | 03RD4KZ | Replacement of Right Hand Artery with Nonautologous Tissue Substitute, Percutaneous Endoscopic Approach                | 04S63DZ |                                                                                       |                                                                                       |                                                     | nan | False | 027H0NZ |                                                                       |                                                                       | nan                        | False |
| 84 | 06R20JZ | Replacement of Gastric Vein with Synthetic Substitute, Open Approach                                                   | 06270KZ |                                                                                       |                                                                                       |                                                     | nan | False | 0V597ZZ |                                                                       |                                                                       | nan                        | False |
| 85 | DD14BB1 | Low Dose Rate (LDR) Brachytherapy of Ileum using Palladium 103 (Pd-103), Unidirectional Source                         | D3314UZ |                                                                                       |                                                                                       |                                                     | nan | False | 0TC23ZZ |                                                                       |                                                                       | nan                        | False |
| 86 | 03B53ZX | Excision of Right Axillary Artery, Percutaneous Approach, Diagnostic                                                   | 03504ZZ | Destruction of Right Internal Mammary Artery, Percutaneous Endoscopic Approach        | Destruction of Right Internal Mammary Artery, Percutaneous Endoscopic Approach        | Damaging right upper body arteries                  |     | False | 0RPY04Z |                                                                       |                                                                       | nan                        | False |
| 87 | 0MMS0ZZ | Reattachment of Right Foot Bursa and Ligament, Open Approach                                                           | 0SP90ZZ |                                                                                       |                                                                                       |                                                     | nan | False | 0QY20ZZ |                                                                       |                                                                       | nan                        | False |
| 88 | 03U33JZ | Supplement Right Subclavian Artery with Synthetic Substitute, Percutaneous Approach                                    | 04120KZ |                                                                                       |                                                                                       |                                                     | nan | False | 02770JZ |                                                                       |                                                                       | nan                        | False |
| 89 | 03CN3Z7 | Extirpation of Matter from Left External Carotid Artery using Stent Retriever, Percutaneous Approach                   | 03104DZ |                                                                                       |                                                                                       |                                                     | nan | False | 02743NZ |                                                                       |                                                                       | nan                        | False |
| 90 | 06184Z9 | Bypass Portal Vein to Right Renal Vein, Percutaneous Endoscopic Approach                                               | 02S43ZZ |                                                                                       |                                                                                       |                                                     | nan | False | 06N93ZZ | Release Right Renal Vein, Percutaneous Approach                       | Release Right Renal Vein, Percutaneous Approach                       | Involving right renal vein | False |

|     |         |                                                                                                                          |         |                                                                                       |                                                                                       |                                                                       |       |         |                                                                        |                                                                        |                                       |       |
|-----|---------|--------------------------------------------------------------------------------------------------------------------------|---------|---------------------------------------------------------------------------------------|---------------------------------------------------------------------------------------|-----------------------------------------------------------------------|-------|---------|------------------------------------------------------------------------|------------------------------------------------------------------------|---------------------------------------|-------|
| 91  | 03UV47Z | Supplement Left Thyroid Artery with Autologous Tissue Substitute, Percutaneous Endoscopic Approach                       | 041C3KZ |                                                                                       |                                                                                       | nan                                                                   | False | 02790NZ |                                                                        |                                                                        | nan                                   | False |
| 92  | 0T974ZZ | Drainage of Left Ureter, Percutaneous Endoscopic Approach                                                                | 0T998ZZ |                                                                                       |                                                                                       | nan                                                                   | False | 0TGU7ZZ |                                                                        |                                                                        | nan                                   | False |
| 93  | 031409W | Bypass Left Subclavian Artery to Lower Extremity Vein with Autologous Venous Tissue, Open Approach                       | 041C0JZ |                                                                                       |                                                                                       | nan                                                                   | False | 0QSF0JZ |                                                                        |                                                                        | nan                                   | False |
| 94  | 0F190Z4 | Bypass Common Bile Duct to Stomach, Open Approach                                                                        | 0F194DZ |                                                                                       |                                                                                       | nan                                                                   | False | 0DJD0ZZ | Inspection of Lower Intestinal Tract, Open Approach                    | Inspection of Lower Intestinal Tract, Open Approach                    | Related to the gastrointestinal tract | False |
| 95  | 009900Z | Drainage of Thalamus with Drainage Device, Open Approach                                                                 | 01HY0KZ |                                                                                       |                                                                                       | nan                                                                   | False | 0TGK7ZZ |                                                                        |                                                                        | nan                                   | False |
| 96  | 089Q3ZZ | Drainage of Right Lower Eyelid, Percutaneous Approach                                                                    | 08HR4ZZ |                                                                                       |                                                                                       | nan                                                                   | False | 0LQMQZZ | Repair Left Upper Leg Tendon, Open Approach                            | Repair Left Upper Leg Tendon, Open Approach                            | nan                                   | False |
| 97  | 0S9430Z | Drainage of Lumbosacral Disc with Drainage Device, Percutaneous Approach                                                 | 05HY3KZ |                                                                                       |                                                                                       | nan                                                                   | False | 0RG74ZZ |                                                                        |                                                                        | nan                                   | False |
| 98  | 05QN3ZZ | Repair Left Internal Jugular Vein, Percutaneous Approach                                                                 | 03RC3ZZ |                                                                                       |                                                                                       | nan                                                                   | False | 0RNB4ZZ | Release Thoracolumbar Vertebral Disc, Percutaneous Endoscopic Approach | Release Thoracolumbar Vertebral Disc, Percutaneous Endoscopic Approach | nan                                   | False |
| 99  | 0MBN0ZZ | Excision of Right Knee Bursa and Ligament, Open Approach                                                                 | 0K9H0ZZ | Drainage of Right Thorax Muscle, Open Approach                                        | Drainage of Right Thorax Muscle, Open Approach                                        | nan                                                                   | False | 0QY90ZZ |                                                                        |                                                                        | nan                                   | False |
| 100 | 047R46Z | Dilation of Right Posterior Tibial Artery with Three Drug-eluting Intraluminal Devices, Percutaneous Endoscopic Approach | 027F34Z | Dilation of Aortic Valve with Drug-eluting Intraluminal Device, Percutaneous Approach | Dilation of Aortic Valve with Drug-eluting Intraluminal Device, Percutaneous Approach | Dilation of vascular structure with drug-eluting intraluminal devices | False | 027S0JZ |                                                                        |                                                                        | nan                                   | False |
